# Supplementary material
Source: PubMed Central journal article supplement (PMC4065861)
Supplement: NIHMS109456-supplement-suppmat.pdf [file NIHMS109456-supplement-suppmat.pdf]

**Supplementary Table S1:** 109 genes whose expression was altered by exercise in early pubertal boys

| Probe set    | Gene symbol | t-test p-value | Fold Change | Probe set    | Gene symbol | t-test p-value | Fold Change |
|--------------|-------------|----------------|-------------|--------------|-------------|----------------|-------------|
| 202581_at    | HSPA1B      | 0.0000001      | 3.2         | 212453_at    | KIAA1279    | 0.0000317      | 1.4         |
| 211333_s_at  | FASLG       | 0.0000074      | 3.2         | 226323_at    | CCDC16      | 0.0000017      | 1.4         |
| 226479_at    | KBTBD6      | 0.0000027      | 2.3         | 220924_s_at  | SLC38A2     | 0.0000006      | 1.4         |
| 206098_at    | ZBTB6       | 0.0001117      | 2.2         | 225644_at    | CCDC117     | 0.0001022      | 1.4         |
| 230097_at    | GART        | 0.0000288      | 2.1         | 210971_s_at  | ARNTL       | 0.0000737      | 1.4         |
| 236128_at    | ZNF91       | 0.000021       | 1.8         | 226317_at    | PPP4R2      | 0.0000336      | 1.4         |
| 205094_at    | PEX12       | 0.0000431      | 1.8         | 230226_s_at  | JARID1A     | 0.000052       | 1.4         |
| 229732_at    | HSZFP36     | 0.0000079      | 1.7         | 1554449_at   | MIER3       | 0.000076       | 1.4         |
| 214132_at    | ATP5C1      | 0.0000184      | 1.7         | 214583_at    | RSC1A1      | 0.0000926      | 1.4         |
| 214706_at    | ZNF200      | 0.0000018      | 1.7         | 225970_at    | DDHD1       | 0.0000961      | 1.4         |
| 231776_at    | EOMES       | 0.0000196      | 1.7         | 222471_s_at  | KCMF1       | 0.0000676      | 1.4         |
| 214193_s_at  | C1orf107    | 0.0000449      | 1.6         | 225416_at    | RNF12       | 0.0000217      | 1.4         |
| 213625_at    | ZKSCAN4     | 0.0000513      | 1.6         | 201703_s_at  | PPP1R10     | 0.0000635      | 1.4         |
| 1554455_at   | LINS1       | 0.0000171      | 1.6         | 203810_at    | DNAJB4      | 0.000056       | 1.4         |
| 210279_at    | GPR18       | 0.0000173      | 1.6         | 218501_at    | ARHGEF3     | 0.0000058      | 1.3         |
| 230075_at    | RAB39B      | 0.0000149      | 1.6         | 1553725_s_at | ZNF644      | 0.000103       | 1.3         |
| 212731_at    | ANKRD46     | 0.000003       | 1.6         | 218113_at    | TMEM2       | 0.0000344      | 1.3         |
| 214820_at    | BRWD1       | 0.0000009      | 1.6         | 238077_at    | KCTD6       | 0.000041       | 1.3         |
| 201111_at    | CSE1L       | 0.0000019      | 1.5         | 222656_at    | UBE2W       | 0.0000454      | 1.3         |
| 225539_at    | ZNF295      | 0.0000458      | 1.5         | 201363_s_at  | IVNS1ABP    | 0.0000664      | 1.3         |
| 239439_at    | AFF4        | 0.0000036      | 1.5         | 223081_at    | PHF23       | 0.0000641      | 1.3         |
| 227693_at    | WDR20       | 0.0000073      | 1.5         | 212366_at    | ZNF292      | 0.0000437      | 1.3         |
| 1552312_a_at | MFAP3       | 0.0000067      | 1.5         | 202970_at    | DYRK2       | 0.0000487      | 1.3         |
| 205928_at    | ZNF443      | 0.0000957      | 1.5         | 218131_s_at  | GATAD2A     | 0.0000962      | 1.3         |
| 229723_at    | TAGAP       | 0.0000089      | 1.5         | 206943_at    | TGFBR1      | 0.0000365      | 1.3         |
| 1556821_x_at | DLEU2       | 0.0000434      | 1.5         | 235175_at    | GBP4        | 0.0000804      | 1.3         |
| 203406_at    | MFAP1       | 0.0000163      | 1.5         | 226077_at    | RNF145      | 0.0000773      | 1.3         |
| 239377_at    | EIF1AD      | 0.0000576      | 1.5         | 1568665_at   | RNF103      | 0.000114       | 1.3         |
| 213694_at    | RSBN1       | 0.0000557      | 1.5         | 221702_s_at  | TM2D3       | 0.0000305      | 1.3         |
| 212367_at    | FEM1B       | 0.0000222      | 1.5         | 1552516_a_at | HIPK1       | 0.0000733      | 1.2         |
| 222662_at    | PPP1R3B     | 0.0000266      | 1.5         | 229711_s_at  | MGC5370     | 0.0000737      | 1.2         |
| 200811_at    | CIRBP       | 0.0000872      | 1.5         | 202168_at    | TAF9        | 0.0001018      | 0.8         |
| 213021_at    | GOSR1       | 0.0000048      | 1.5         | 217783_s_at  | YPEL5       | 0.0000241      | 0.8         |
| 226321_at    | LYSMD3      | 0.0000507      | 1.4         | 224734_at    | HMGB1       | 0.0000269      | 0.8         |
| 223240_at    | FBXO8       | 0.0000173      | 1.4         | 209911_x_at  | HIST1H2BD   | 0.0000505      | 0.8         |
| 213341_at    | FEM1C       | 0.0000487      | 1.4         | 217825_s_at  | UBE2J1      | 0.0000067      | 0.8         |
| 222763_s_at  | WDR33       | 0.0000764      | 1.4         | 229812_at    | USP48       | 0.0000576      | 0.8         |
| 224310_s_at  | BCL11B      | 0.0000895      | 1.4         | 227189_at    | CPNE5       | 0.0000385      | 0.7         |
| 207753_at    | ZNF304      | 0.0000336      | 1.4         | 242304_at    | WIBG        | 0.0001159      | 0.7         |
| 218247_s_at  | MEX3C       | 0.000085       | 1.4         | 235173_at    | hCG_1806964 | 0.0000966      | 0.7         |
| 239482_x_at  | ZNF708      | 0.0001132      | 1.4         | 227414_at    | RHBDD1      | 0.0000565      | 0.7         |
| 235151_at    | LOC283357   | 0.0001115      | 1.4         | 201559_s_at  | CLIC4       | 0.0000114      | 0.7         |
| 226541_at    | FBXO30      | 0.000034       | 1.4         | 219551_at    | EAF2        | 0.000012       | 0.7         |
| 226481_at    | VPRBP       | 0.0000497      | 1.4         | 232441_at    | KRR1        | 0.0000238      | 0.7         |
| 204642_at    | EDG1        | 0.0000019      | 1.4         | 1559399_s_at | ZCCHC10     | 0.0000671      | 0.6         |
| 227638_at    | KIAA1632    | 0.0000915      | 1.4         | 228381_at    | ATF7IP2     | 0.0001017      | 0.6         |
| 227689_at    | ZNF227      | 0.0000018      | 1.4         | 211998_at    | H3F3B       | 0.0000061      | 0.6         |
| 226015_at    | ZNF12       | 0.0000069      | 1.4         | 231990_at    | USP15       | 0.0000287      | 0.6         |

---

| Probe set  | Gene symbol | t-test p-value | Fold Change | Probe set  | Gene symbol | t-test p-value | Fold Change |
|------------|-------------|----------------|-------------|------------|-------------|----------------|-------------|
| 212531_at  | LCN2        | 0.0000092      | <b>0.6</b>  | 1560274_at | WTAP        | 0.000002       | <b>0.6</b>  |
| 236244_at  | HNRNPU      | 0.0000717      | <b>0.6</b>  | 232216_at  | YME1L1      | 0.0000927      | <b>0.5</b>  |
| 1565651_at | ARF1        | 0.0000554      | <b>0.6</b>  | 1559975_at | BTG1        | 0.0000918      | <b>0.5</b>  |
| 242146_at  | SNRPA1      | 0.0000203      | <b>0.6</b>  | 232529_at  | SP3         | 0.0000023      | <b>0.5</b>  |
| 212225_at  | EIF1        | 0.0000985      | <b>0.6</b>  | 241843_at  | SNORA28     | 0.0000141      | <b>0.4</b>  |
| 238738_at  | PSMD7       | 0.000016       | <b>0.6</b>  | 1565716_at | FUS         | 0.0000492      | <b>0.2</b>  |
| 238633_at  | EPC1        | 0.0000195      | <b>0.6</b>  |            |             |                |             |

---

**Supplementary Table S2:** 1246 genes whose expression was altered by exercise in late pubertal boys

| Probe set    | Gene symbol | t-test p-value | Fold Change | Probe set    | Gene symbol | t-test p-value | Fold Change |
|--------------|-------------|----------------|-------------|--------------|-------------|----------------|-------------|
| 202581_at    | HSPA1B      | < 1E-07        | 4.7         | 213849_s_at  | PPP2R2B     | 0.0000057      | 1.9         |
| 211333_s_at  | FASLG       | < 1E-07        | 4.2         | 216836_s_at  | ERBB2       | 0.000007       | 1.9         |
| 207314_x_at  | KIR3DL2     | < 1E-07        | 3.7         | 219821_s_at  | GFOD1       | < 1E-07        | 1.9         |
| 205767_at    | EREG        | 0.0000309      | 3.6         | 207840_at    | CD160       | 0.0000017      | 1.9         |
| 208179_x_at  | KIR2DL3     | < 1E-07        | 3.1         | 204161_s_at  | ENPP4       | 0.0001567      | 1.9         |
| 225202_at    | RHOBTB3     | 0.0000007      | 3.0         | 209198_s_at  | SYT11       | 0.0000258      | 1.9         |
| 209160_at    | AKR1C3      | < 1E-07        | 3.0         | 228373_at    | C16orf72    | 0.0000007      | 1.9         |
| 1553176_at   | SH2D1B      | 0.0000001      | 3.0         | 1562255_at   | SYTL3       | 0.0000425      | 1.9         |
| 211687_x_at  | KIR3DL1     | < 1E-07        | 2.9         | 204731_at    | TGFBR3      | 0.0000001      | 1.9         |
| 234165_at    | PTGDR       | 0.0000007      | 2.8         | 231776_at    | EOMES       | 0.0000032      | 1.9         |
| 219304_s_at  | PDGFD       | 0.0000025      | 2.8         | 210606_x_at  | KLRD1       | 0.0000032      | 1.9         |
| 238478_at    | BNC2        | 0.0005807      | 2.7         | 203921_at    | CHST2       | < 1E-07        | 1.9         |
| 227394_at    | NCAM1       | 0.000074       | 2.7         | 207072_at    | IL18RAP     | 0.0000026      | 1.9         |
| 200907_s_at  | PALLD       | 0.0000001      | 2.7         | 211597_s_at  | HOPX        | 0.0000015      | 1.9         |
| 230464_at    | EDG8        | 0.0000002      | 2.6         | 206366_x_at  | XCL2        | 0.0000048      | 1.9         |
| 222071_s_at  | SLCO4C1     | 0.0000066      | 2.5         | 220603_s_at  | MCTP2       | 0.0000082      | 1.9         |
| 206582_s_at  | GPR56       | 0.0000041      | 2.5         | 223740_at    | RIPPLY2     | 0.0000004      | 1.9         |
| 218638_s_at  | SPON2       | 0.0000005      | 2.5         | 201163_s_at  | IGFBP7      | 0.0000113      | 1.9         |
| 202458_at    | PRSS23      | 0.0000004      | 2.5         | 1553962_s_at | RHOB        | 0.0000586      | 1.9         |
| 219529_at    | CLIC3       | 0.0000001      | 2.5         | 204170_s_at  | CKS2        | 0.0001698      | 1.8         |
| 227803_at    | ENPP5       | 0.0000094      | 2.5         | 205495_s_at  | GNLY        | 0.0000052      | 1.8         |
| 227819_at    | LGR6        | 0.0000007      | 2.4         | 201169_s_at  | BHLHB2      | 0.0000423      | 1.8         |
| 213395_at    | MLC1        | 0.0000001      | 2.4         | 215761_at    | DMXL2       | 0.0000145      | 1.8         |
| 206233_at    | B4GALT6     | 0.0000126      | 2.4         | 209967_s_at  | CREM        | 0.0000389      | 1.8         |
| 219383_at    | FLJ14213    | 0.0000001      | 2.4         | 211748_x_at  | PTGDS       | 0.0000036      | 1.8         |
| 206170_at    | ADRB2       | 0.0000005      | 2.4         | 226003_at    | KIF21A      | 0.0000082      | 1.8         |
| 204790_at    | SMAD7       | < 1E-07        | 2.3         | 205839_s_at  | BZRAP1      | 0.0000575      | 1.8         |
| 210164_at    | GZMB        | < 1E-07        | 2.3         | 204566_at    | PPM1D       | 0.0000088      | 1.8         |
| 205826_at    | MYOM2       | 0.0004147      | 2.2         | 206618_at    | IL18R1      | 0.0000925      | 1.8         |
| 202933_s_at  | YES1        | 0.0000023      | 2.2         | 213915_at    | NKG7        | 0.0000005      | 1.8         |
| 220684_at    | TBX21       | 0.0000002      | 2.2         | 227410_at    | FAM43A      | 0.0003931      | 1.8         |
| 223836_at    | FGFBP2      | 0.0000002      | 2.2         | 204256_at    | ELOVL6      | 0.0002781      | 1.8         |
| 223126_s_at  | C1orf21     | 0.0000032      | 2.2         | 205898_at    | CX3CR1      | 0.0000034      | 1.8         |
| 207351_s_at  | SH2D2A      | < 1E-07        | 2.2         | 201340_s_at  | ENC1        | 0.0000052      | 1.8         |
| 220646_s_at  | KLRF1       | 0.0000007      | 2.1         | 204811_s_at  | CACNA2D2    | 0.0000002      | 1.8         |
| 225688_s_at  | PHLDB2      | 0.0000818      | 2.1         | 205291_at    | IL2RB       | 0.0000004      | 1.8         |
| 230179_at    | LOC285812   | < 1E-07        | 2.1         | 220613_s_at  | SYTL2       | 0.0000175      | 1.8         |
| 216748_at    | PYHIN1      | 0.0000034      | 2.1         | 228296_at    | YPEL1       | 0.0000461      | 1.8         |
| 1553681_a_at | PRF1        | 0.0000003      | 2.1         | 205692_s_at  | CD38        | 0.000027       | 1.8         |
| 204066_s_at  | CENTG2      | 0.0000021      | 2.1         | 209815_at    | PTCH1       | 0.0000152      | 1.7         |
| 204103_at    | CCL4        | 0.0000026      | 2.1         | 202679_at    | NPC1        | < 1E-07        | 1.7         |
| 203908_at    | SLC4A4      | 0.0000427      | 2.1         | 212599_at    | AUTS2       | 0.0000002      | 1.7         |
| 207509_s_at  | LAIR2       | 0.0000065      | 2.0         | 207723_s_at  | KLRC3       | 0.0000021      | 1.7         |
| 206999_at    | IL12RB2     | 0.0000032      | 2.0         | 203060_s_at  | PAPSS2      | 0.0002253      | 1.7         |
| 210321_at    | GZMH        | 0.0000001      | 2.0         | 222786_at    | CHST12      | 0.000001       | 1.7         |
| 204614_at    | SERPINB2    | 0.0000131      | 2.0         | 227124_at    | LOC221710   | 0.0000134      | 1.7         |
| 210140_at    | CST7        | 0.0000001      | 2.0         | 213906_at    | MYBL1       | 0.0000012      | 1.7         |
| 235458_at    | HAVCR2      | 0.0000002      | 2.0         | 211685_s_at  | NCALD       | 0.0000115      | 1.7         |

| Probe set    | Gene symbol | t-test p-value | Fold Change | Probe set    | Gene symbol | t-test p-value | Fold Change |
|--------------|-------------|----------------|-------------|--------------|-------------|----------------|-------------|
| 225954_s_at  | MIDN        | 0.00068        | 1.7         | 217078_s_at  | CD300A      | 0.0000095      | 1.5         |
| 218880_at    | FOSL2       | 0.0002933      | 1.7         | 1559051_s_at | C6orf150    | 0.0001779      | 1.5         |
| 208426_x_at  | KIR2DL4     | 0.0003046      | 1.7         | 238551_at    | FUT11       | 0.0000331      | 1.5         |
| 214450_at    | CTSW        | 0.0000051      | 1.7         | 1559101_at   | FYN         | 0.0000472      | 1.5         |
| 205488_at    | GZMA        | 0.0000005      | 1.7         | 201392_s_at  | IGF2R       | 0.0000004      | 1.5         |
| 206267_s_at  | MATK        | 0.0000043      | 1.7         | 209927_s_at  | C1orf77     | 0.0005495      | 1.5         |
| 229215_at    | ASCL2       | 0.0000053      | 1.7         | 209457_at    | DUSP5       | 0.0007314      | 1.5         |
| 238121_at    | GK5         | 0.0000479      | 1.7         | 206943_at    | TGFBR1      | 0.0000376      | 1.5         |
| 213348_at    | CDKN1C      | 0.0002172      | 1.7         | 207008_at    | IL8RB       | 0.0000868      | 1.5         |
| 220416_at    | ATP8B4      | 0.0006783      | 1.7         | 233734_s_at  | OSBPL5      | 0.0000028      | 1.5         |
| 240061_at    | tcag7.1314  | 0.0001906      | 1.6         | 204897_at    | PTGER4      | 0.0000004      | 1.5         |
| 207860_at    | NCR1        | 0.0000169      | 1.6         | 1555766_a_at | GNG2        | 0.0000301      | 1.5         |
| 222838_at    | SLAMF7      | 0.0000212      | 1.6         | 205232_s_at  | PAFAH2      | 0.0001839      | 1.5         |
| 236717_at    | LOC165186   | 0.0000025      | 1.6         | 1553423_a_at | SLFN13      | 0.000609       | 1.5         |
| 228846_at    | MXD1        | 0.0010581      | 1.6         | 209362_at    | MED21       | 0.0000086      | 1.5         |
| 212509_s_at  | MXRA7       | 0.0000046      | 1.6         | 219540_at    | ZNF267      | 0.0000065      | 1.5         |
| 212589_at    | RRAS2       | 0.0003494      | 1.6         | 203713_s_at  | LLGL2       | 0.0001592      | 1.5         |
| 226489_at    | TMCC3       | 0.0000497      | 1.6         | 228283_at    | C3orf68     | 0.000009       | 1.5         |
| 205171_at    | PTPN4       | 0.00001        | 1.6         | 242463_x_at  | ZNF600      | 0.0000638      | 1.5         |
| 203502_at    | BPGM        | 0.0000046      | 1.6         | 214467_at    | GPR65       | 0.000004       | 1.5         |
| 220924_s_at  | SLC38A2     | 0.0000004      | 1.6         | 204841_s_at  | EEA1        | 0.0010867      | 1.5         |
| 210690_at    | KLRC4       | 0.0002277      | 1.6         | 1565754_x_at | FGD2        | 0.0008594      | 1.5         |
| 228904_at    | HOXB3       | 0.0002058      | 1.6         | 204554_at    | PPP1R3D     | 0.0000324      | 1.5         |
| 203397_s_at  | GALNT3      | 0.000014       | 1.6         | 204198_s_at  | RUNX3       | 0.0000023      | 1.5         |
| 230206_at    | DOCK5       | 0.0000751      | 1.6         | 232945_at    | CCDC139     | 0.0005334      | 1.5         |
| 1562368_at   | CARD11      | 0.000567       | 1.6         | 223490_s_at  | EXOSC3      | 0.0003796      | 1.5         |
| 201218_at    | CTBP2       | 0.0000339      | 1.6         | 228964_at    | PRDM1       | 0.0010963      | 1.5         |
| 204007_at    | FCGR3B      | 0.0000006      | 1.6         | 238560_at    | CALCOCO2    | 0.0008024      | 1.5         |
| 207224_s_at  | SIGLEC7     | 0.0001189      | 1.6         | 212665_at    | TIPARP      | 0.0000274      | 1.5         |
| 1552678_a_at | USP28       | 0.0000511      | 1.6         | 221563_at    | DUSP10      | 0.0000013      | 1.5         |
| 221679_s_at  | ABHD6       | 0.0002792      | 1.6         | 227948_at    | FGD4        | 0.0002484      | 1.5         |
| 225005_at    | PHF13       | 0.000067       | 1.6         | 223474_at    | C14orf4     | 0.0000159      | 1.5         |
| 215375_x_at  | LRRFIP1     | 0.0000522      | 1.6         | 205410_s_at  | ATP2B4      | 0.0001709      | 1.5         |
| 229971_at    | GPR114      | 0.0000908      | 1.6         | 224956_at    | NUFIP2      | 0.0000167      | 1.5         |
| 227312_at    | SNTB2       | 0.0000042      | 1.6         | 222872_x_at  | OBFC2A      | 0.0001635      | 1.5         |
| 207460_at    | GZMM        | 0.0000014      | 1.6         | 200799_at    | HSPA1A      | 0.0000042      | 1.5         |
| 204529_s_at  | TOX         | 0.0000173      | 1.6         | 1552312_a_at | MFAP3       | 0.0010818      | 1.5         |
| 226372_at    | CHST11      | 0.0000011      | 1.6         | 223081_at    | PHF23       | 0.000031       | 1.5         |
| 242224_at    | GPATCH2     | 0.000164       | 1.6         | 206118_at    | STAT4       | 0.0000568      | 1.5         |
| 201818_at    | LPCAT1      | 0.0000012      | 1.6         | 202150_s_at  | NEDD9       | 0.0000031      | 1.5         |
| 202786_at    | STK39       | 0.0000047      | 1.6         | 202336_s_at  | PAM         | 0.0000192      | 1.5         |
| 202068_s_at  | LDLR        | 0.0001166      | 1.6         | 204735_at    | PDE4A       | 0.0002039      | 1.5         |
| 206098_at    | ZBTB6       | 0.0011813      | 1.6         | 226518_at    | KCTD10      | 0.0000695      | 1.5         |
| 209993_at    | ABCB1       | 0.0005441      | 1.6         | 228654_at    | SPIN4       | 0.000473       | 1.5         |
| 228774_at    | CEP78       | 0.0000001      | 1.5         | 225116_at    | HIPK2       | 0.0000111      | 1.5         |
| 210031_at    | CD247       | 0.0000003      | 1.5         | 220307_at    | CD244       | 0.0000139      | 1.5         |
| 1555878_at   | RPS24       | 0.0000674      | 1.5         | 1552263_at   | MAPK1       | 0.0000039      | 1.5         |
| 219210_s_at  | RAB8B       | 0.0000568      | 1.5         | 1556009_at   | PEX13       | 0.0009341      | 1.5         |
| 222693_at    | FNDC3B      | 0.0000069      | 1.5         | 221808_at    | RAB9A       | 0.0000028      | 1.5         |
| 239963_at    | FLJ43276    | 0.0002941      | 1.5         | 214061_at    | WDR67       | 0.0010224      | 1.5         |

| Probe set    | Gene symbol | t-test p-value | Fold Change | Probe set    | Gene symbol | t-test p-value | Fold Change |
|--------------|-------------|----------------|-------------|--------------|-------------|----------------|-------------|
| 213418_at    | HSPA6       | 0.0000873      | 1.5         | 212367_at    | FEM1B       | 0.0000874      | 1.4         |
| 218113_at    | TMEM2       | 0.0000115      | 1.5         | 210763_x_at  | NCR3        | 0.0005172      | 1.4         |
| 236692_at    | LOC729839   | 0.0000554      | 1.4         | 212959_s_at  | GNPTAB      | 0.0001233      | 1.4         |
| 222243_s_at  | TOB2        | 0.0007341      | 1.4         | 205179_s_at  | ADAM8       | 0.0000203      | 1.4         |
| 228201_at    | ARL13B      | 0.0004053      | 1.4         | 218472_s_at  | PELO        | 0.0006767      | 1.4         |
| 225644_at    | CCDC117     | 0.0000624      | 1.4         | 208010_s_at  | PTPN22      | 0.0002565      | 1.4         |
| 205018_s_at  | MBNL2       | 0.0000856      | 1.4         | 205016_at    | TGFA        | 0.0000996      | 1.4         |
| 206656_s_at  | C20orf3     | 0.0000038      | 1.4         | 238909_at    | S100A10     | 0.0009125      | 1.4         |
| 200952_s_at  | CCND2       | 0.0004077      | 1.4         | 223240_at    | FBXO8       | 0.0009635      | 1.4         |
| 225177_at    | RAB11FIP1   | 0.0000016      | 1.4         | 202208_s_at  | ARL4C       | 0.0000033      | 1.4         |
| 204497_at    | ADCY9       | 0.0006261      | 1.4         | 207643_s_at  | TNFRSF1A    | 0.0000324      | 1.4         |
| 202388_at    | RGS2        | 0.0000222      | 1.4         | 210360_s_at  | MTSS1       | 0.0010061      | 1.4         |
| 222763_s_at  | WDR33       | 0.0000066      | 1.4         | 212565_at    | STK38L      | 0.000325       | 1.4         |
| 226021_at    | RDH10       | 0.0004295      | 1.4         | 217992_s_at  | EFHD2       | 0.0000139      | 1.4         |
| 221485_at    | B4GALT5     | 0.0000221      | 1.4         | 1565818_s_at | IKZF1       | 0.0002013      | 1.4         |
| 57715_at     | FAM26B      | 0.0000087      | 1.4         | 210540_s_at  | B4GALT4     | 0.0000155      | 1.4         |
| 235451_at    | SMAD5       | 0.0000923      | 1.4         | 209205_s_at  | LMO4        | 0.0004404      | 1.4         |
| 204205_at    | APOBEC3G    | 0.0000642      | 1.4         | 221430_s_at  | RNF146      | 0.000088       | 1.4         |
| 215285_s_at  | PHTF1       | 0.0004898      | 1.4         | 204226_at    | STAU2       | 0.0003172      | 1.4         |
| 208869_s_at  | GABARAPL1   | 0.0010611      | 1.4         | 228410_at    | GAB3        | 0.0000238      | 1.4         |
| 219885_at    | SLFN12      | 0.0009877      | 1.4         | 1556698_a_at | GPRIN3      | 0.0000209      | 1.4         |
| 236782_at    | SAMD3       | 0.000234       | 1.4         | 240037_at    | KIAA1754L   | 0.0002071      | 1.4         |
| 1568964_x_at | SPN         | 0.0000003      | 1.4         | 200881_s_at  | DNAJA1      | 0.0000084      | 1.4         |
| 218904_s_at  | C9orf40     | 0.0000636      | 1.4         | 231152_at    | FLJ20309    | 0.0002758      | 1.4         |
| 205467_at    | CASP10      | 0.0000213      | 1.4         | 226175_at    | TTC9C       | 0.000127       | 1.4         |
| 202540_s_at  | HMGCR       | 0.00013        | 1.4         | 212772_s_at  | ABCA2       | 0.0005351      | 1.4         |
| 203406_at    | MFAP1       | 0.0000105      | 1.4         | 46665_at     | SEMA4C      | 0.0000919      | 1.4         |
| 213280_at    | GARNL4      | 0.0000032      | 1.4         | 203603_s_at  | ZEB2        | 0.0004532      | 1.4         |
| 221978_at    | HLA-F       | 0.0001198      | 1.4         | 210971_s_at  | ARNTL       | 0.0000031      | 1.4         |
| 210279_at    | GPR18       | 0.0001294      | 1.4         | 202910_s_at  | CD97        | 0.0000194      | 1.4         |
| 230226_s_at  | JARID1A     | 0.0000096      | 1.4         | 239629_at    | CFLAR       | 0.0001626      | 1.4         |
| 201942_s_at  | CPD         | 0.0000558      | 1.4         | 208116_s_at  | MAN1A1      | 0.0005561      | 1.4         |
| 222603_at    | ERMP1       | 0.0001304      | 1.4         | 200885_at    | RHOC        | 0.0005606      | 1.4         |
| 219017_at    | ETNK1       | 0.000421       | 1.4         | 222757_s_at  | ZAK         | 0.0003996      | 1.4         |
| 239431_at    | TICAM2      | 0.0008878      | 1.4         | 1556821_x_at | DLEU2       | 0.0001765      | 1.4         |
| 1558826_at   | C20orf174   | 0.0008834      | 1.4         | 221803_s_at  | NRBF2       | 0.0000208      | 1.4         |
| 206631_at    | PTGER2      | 0.0000024      | 1.4         | 218247_s_at  | MEX3C       | 0.0003011      | 1.4         |
| 223615_at    | ABI3        | 0.0000084      | 1.4         | 1558304_s_at | TSEN54      | 0.0000165      | 1.4         |
| 226576_at    | ARHGAP26    | 0.000026       | 1.4         | 205566_at    | ABHD2       | 0.0006831      | 1.4         |
| 213164_at    | SLC5A3      | 0.0000509      | 1.4         | 1557236_at   | APOL6       | 0.0006718      | 1.4         |
| 225099_at    | FBXO45      | 0.0000062      | 1.4         | 219558_at    | ATP13A3     | 0.000386       | 1.4         |
| 227013_at    | LATS2       | 0.0000046      | 1.4         | 230012_at    | C17orf44    | 0.0002354      | 1.4         |
| 212731_at    | ANKRD46     | 0.0003447      | 1.4         | 231769_at    | FBXO6       | 0.0000916      | 1.4         |
| 240070_at    | VSTM3       | 0.0001421      | 1.4         | 225582_at    | KIAA1754    | 0.0000661      | 1.4         |
| 223394_at    | SERTAD1     | 0.0000428      | 1.4         | 200796_s_at  | MCL1        | 0.0003948      | 1.4         |
| 218739_at    | ABHD5       | 0.0007816      | 1.4         | 225043_at    | SLC15A4     | 0.0000427      | 1.4         |
| 35671_at     | GTF3C1      | 0.0001615      | 1.4         | 242943_at    | ST8SIA4     | 0.0006362      | 1.4         |
| 228073_at    | NANP        | 0.0004097      | 1.4         | 226991_at    | NFATC2      | 0.0001061      | 1.4         |
| 203823_at    | RGS3        | 0.0011312      | 1.4         | 1552812_a_at | SENP1       | 0.0000413      | 1.4         |
| 203989_x_at  | F2R         | 0.0000559      | 1.4         | 211791_s_at  | KCNAB2      | 0.0001122      | 1.4         |

| Probe set    | Gene symbol | t-test p-value | Fold Change | Probe set    | Gene symbol | t-test p-value | Fold Change |
|--------------|-------------|----------------|-------------|--------------|-------------|----------------|-------------|
| 230634_x_at  | ADAT3       | 0.0000524      | 1.4         | 201111_at    | CSE1L       | 0.0004157      | 1.3         |
| 229723_at    | TAGAP       | 0.0000049      | 1.3         | 214551_s_at  | CD7         | 0.0000955      | 1.3         |
| 1553725_s_at | ZNF644      | 0.0001021      | 1.3         | 202351_at    | ITGAV       | 0.0003276      | 1.3         |
| 202794_at    | INPP1       | 0.0000546      | 1.3         | 201146_at    | NFE2L2      | 0.0000629      | 1.3         |
| 238649_at    | PITPNC1     | 0.0010605      | 1.3         | 221830_at    | RAP2A       | 0.0000778      | 1.3         |
| 205928_at    | ZNF443      | 0.0000461      | 1.3         | 226743_at    | SLFN11      | 0.0006197      | 1.3         |
| 223542_at    | ANKRD32     | 0.0003141      | 1.3         | 230405_at    | LOC441108   | 0.0001037      | 1.3         |
| 206099_at    | PRKCH       | 0.0004678      | 1.3         | 202761_s_at  | SYNE2       | 0.0005694      | 1.3         |
| 203810_at    | DNAJB4      | 0.0000142      | 1.3         | 219490_s_at  | DCLRE1B     | 0.000969       | 1.3         |
| 204137_at    | GPR137B     | 0.0002597      | 1.3         | 218869_at    | MLYCD       | 0.0010062      | 1.3         |
| 203313_s_at  | TGIF1       | 0.0004771      | 1.3         | 223434_at    | GBP3        | 0.0005458      | 1.3         |
| 200827_at    | PLOD1       | 0.0000563      | 1.3         | 219326_s_at  | B3GNT2      | 0.0007756      | 1.3         |
| 209340_at    | UAP1        | 0.0000281      | 1.3         | 205277_at    | PRDM2       | 0.0001216      | 1.3         |
| 206247_at    | MICB        | 0.0000129      | 1.3         | 226752_at    | TMEM157     | 0.0010101      | 1.3         |
| 224571_at    | IRF2BP2     | 0.0001666      | 1.3         | 213916_at    | ZNF20       | 0.0005728      | 1.3         |
| 204204_at    | SLC31A2     | 0.0001906      | 1.3         | 201140_s_at  | RAB5C       | 0.0008631      | 1.3         |
| 1559044_at   | EXOSC1      | 0.0009181      | 1.3         | 208961_s_at  | KLF6        | 0.0000406      | 1.3         |
| 231956_at    | KIAA1618    | 0.000738       | 1.3         | 211139_s_at  | NAB1        | 0.0009762      | 1.3         |
| 214706_at    | ZNF200      | 0.0002529      | 1.3         | 205453_at    | HOXB2       | 0.0007692      | 1.3         |
| 206474_at    | PCTK2       | 0.0000162      | 1.3         | 240757_at    | CLASP1      | 0.0001409      | 1.3         |
| 202925_s_at  | PLAGL2      | 0.0003179      | 1.3         | 225841_at    | C1orf59     | 0.0000567      | 1.3         |
| 215990_s_at  | BCL6        | 0.0002103      | 1.3         | 231929_at    | IKZF2       | 0.0000268      | 1.3         |
| 223983_s_at  | C19orf12    | 0.0004851      | 1.3         | 225408_at    | MBP         | 0.0003817      | 1.3         |
| 223441_at    | SLC17A5     | 0.0001317      | 1.3         | 225647_s_at  | CTSC        | 0.0000454      | 1.3         |
| 1554397_s_at | UEVLD       | 0.0011511      | 1.3         | 205687_at    | UBFD1       | 0.0002975      | 1.3         |
| 227693_at    | WDR20       | 0.0006846      | 1.3         | 227687_at    | HYLS1       | 0.0004269      | 1.3         |
| 211250_s_at  | SH3BP2      | 0.0002851      | 1.3         | 238077_at    | KCTD6       | 0.000511       | 1.3         |
| 201703_s_at  | PPP1R10     | 0.000044       | 1.3         | 1564053_a_at | YTHDF3      | 0.0002668      | 1.3         |
| 227236_at    | TSPAN2      | 0.0000186      | 1.3         | 212856_at    | DIP         | 0.000724       | 1.3         |
| 201920_at    | SLC20A1     | 0.0000095      | 1.3         | 1555691_a_at | KLRK1       | 0.0002103      | 1.3         |
| 243786_at    | ZDHHC20     | 0.0002114      | 1.3         | 209682_at    | CBLB        | 0.0000653      | 1.3         |
| 1554449_at   | MIER3       | 0.0004041      | 1.3         | 201363_s_at  | IVNS1ABP    | 0.0000163      | 1.3         |
| 223065_s_at  | STARD3NL    | 0.0000085      | 1.3         | 212502_at    | ADO         | 0.0000125      | 1.3         |
| 209357_at    | CITED2      | 0.0001182      | 1.3         | 208325_s_at  | AKAP13      | 0.0003761      | 1.3         |
| 214470_at    | KLRB1       | 0.000048       | 1.3         | 213387_at    | ATAD2B      | 0.0002605      | 1.3         |
| 226541_at    | FBXO30      | 0.0000722      | 1.3         | 220023_at    | APOB48R     | 0.0005965      | 1.3         |
| 1552623_at   | HSH2D       | 0.0001283      | 1.3         | 219889_at    | FRAT1       | 0.0001121      | 1.3         |
| 222235_s_at  | GALNACT-2   | 0.0000682      | 1.3         | 226157_at    | TFDP2       | 0.0011563      | 1.3         |
| 238581_at    | GBP5        | 0.0002428      | 1.3         | 203474_at    | IQGAP2      | 0.0000455      | 1.3         |
| 214440_at    | NAT1        | 0.0000898      | 1.3         | 209348_s_at  | MAF         | 0.0005703      | 1.3         |
| 208092_s_at  | FAM49A      | 0.0002211      | 1.3         | 210053_at    | TAF5        | 0.0002701      | 1.3         |
| 213023_at    | UTRN        | 0.0000283      | 1.3         | 226605_at    | DGKQ        | 0.0003067      | 1.3         |
| 230265_at    | SEL1L       | 0.0002976      | 1.3         | 225414_at    | RNF149      | 0.0002465      | 1.3         |
| 1552516_a_at | HIPK1       | 0.0000684      | 1.3         | 225127_at    | TMEM181     | 0.0002457      | 1.3         |
| 211810_s_at  | GALC        | 0.0001138      | 1.3         | 223174_at    | BTBD10      | 0.0003481      | 1.3         |
| 206038_s_at  | NR2C2       | 0.0005428      | 1.3         | 226464_at    | C3orf58     | 0.0007849      | 1.3         |
| 223228_at    | LDOC1L      | 0.0000435      | 1.3         | 203252_at    | CDK2AP2     | 0.000077       | 1.3         |
| 203761_at    | SLA         | 0.0003193      | 1.3         | 242136_x_at  | MGC70870    | 0.0008541      | 1.3         |
| 1557562_at   | GRIPAP1     | 0.0005276      | 1.3         | 212723_at    | JMJD6       | 0.0009028      | 1.3         |
| 218126_at    | FAM82C      | 0.0007288      | 1.3         | 203518_at    | LYST        | 0.0010872      | 1.3         |

| Probe set   | Gene symbol | t-test p-value | Fold Change | Probe set    | Gene symbol | t-test p-value | Fold Change |
|-------------|-------------|----------------|-------------|--------------|-------------|----------------|-------------|
| 1558942_at  | ZNF765      | 0.0000873      | 1.3         | 214895_s_at  | ADAM10      | 0.0005357      | 1.2         |
| 219933_at   | GLRX2       | 0.0000571      | 1.3         | 222000_at    | C1orf174    | 0.0003904      | 1.2         |
| 210613_s_at | SYNGR1      | 0.0008064      | 1.3         | 219777_at    | GIMAP6      | 0.0011184      | 1.2         |
| 220319_s_at | MYLIP       | 0.0000868      | 1.3         | 200704_at    | LITAF       | 0.0007058      | 1.2         |
| 219186_at   | ZBTB7A      | 0.0005294      | 1.3         | 226887_at    | HSPA14      | 0.0003388      | 1.2         |
| 200670_at   | XBP1        | 0.0000302      | 1.3         | 213501_at    | ACOX1       | 0.0006596      | 1.2         |
| 226669_at   | USP42       | 0.0001308      | 1.3         | 205786_s_at  | ITGAM       | 0.0003086      | 1.2         |
| 222654_at   | IMPAD1      | 0.0002398      | 1.3         | 214911_s_at  | BRD2        | 0.0004096      | 1.2         |
| 210951_x_at | RAB27A      | 0.0003106      | 1.3         | 204224_s_at  | GCH1        | 0.0001031      | 1.2         |
| 221002_s_at | TSPAN14     | 0.000219       | 1.3         | 231101_at    | PPP2R5E     | 0.0009851      | 1.2         |
| 207246_at   | ZFY         | 0.0008468      | 1.3         | 212306_at    | CLASP2      | 0.0010683      | 1.2         |
| 209296_at   | PPM1B       | 0.0001015      | 1.3         | 222620_s_at  | DNAJC1      | 0.000245       | 1.2         |
| 203291_at   | CNOT4       | 0.0003699      | 1.3         | 51146_at     | PIGV        | 0.000868       | 1.2         |
| 236487_at   | SCLT1       | 0.0003234      | 1.3         | 227638_at    | KIAA1632    | 0.0005648      | 1.2         |
| 204847_at   | ZBTB11      | 0.0004525      | 1.3         | 217299_s_at  | NBN         | 0.0009461      | 1.2         |
| 204079_at   | TPST2       | 0.0001992      | 1.3         | 203141_s_at  | AP3B1       | 0.0009279      | 1.2         |
| 225621_at   | ALG2        | 0.0000501      | 1.3         | 224624_at    | LRRC8A      | 0.000613       | 1.2         |
| 202552_s_at | CRIM1       | 0.0000621      | 1.3         | 222077_s_at  | RACGAP1     | 0.0009754      | 1.2         |
| 225091_at   | ZCCHC3      | 0.0008915      | 1.3         | 224813_at    | WASL        | 0.0002249      | 1.2         |
| 203470_s_at | PLEK        | 0.0002044      | 1.3         | 202211_at    | ARFGAP3     | 0.0008191      | 1.2         |
| 222635_s_at | MED28       | 0.0004231      | 1.3         | 214649_s_at  | MTMR2       | 0.0009979      | 1.2         |
| 214683_s_at | CLK1        | 0.0010224      | 1.3         | 225039_at    | RPE         | 0.000409       | 1.2         |
| 202531_at   | IRF1        | 0.0005899      | 1.3         | 201060_x_at  | STOM        | 0.0004678      | 1.2         |
| 224708_at   | KIAA2013    | 0.0011653      | 1.3         | 201202_at    | PCNA        | 0.0006414      | 1.2         |
| 223466_x_at | COL4A3BP    | 0.0000885      | 1.3         | 224909_s_at  | PREX1       | 0.0011136      | 1.2         |
| 200617_at   | KIAA0152    | 0.0000498      | 1.3         | 204070_at    | RARRES3     | 0.0007446      | 1.2         |
| 225648_at   | STK35       | 0.0001822      | 1.3         | 226178_at    | SOCS4       | 0.0010672      | 1.2         |
| 208774_at   | CSNK1D      | 0.0003241      | 1.3         | 217788_s_at  | GALNT2      | 0.0006708      | 1.2         |
| 218251_at   | MID1IP1     | 0.0006888      | 1.3         | 35265_at     | FXR2        | 0.000364       | 1.2         |
| 201866_s_at | NR3C1       | 0.0000762      | 1.2         | 209380_s_at  | ABCC5       | 0.0009398      | 1.2         |
| 218501_at   | ARHGEF3     | 0.0001525      | 1.2         | 222132_s_at  | AGK         | 0.0001854      | 1.2         |
| 221006_s_at | SNX27       | 0.0005005      | 1.2         | 219495_s_at  | ZNF180      | 0.001193       | 1.2         |
| 213446_s_at | IQGAP1      | 0.0001124      | 1.2         | 213475_s_at  | ITGAL       | 0.0011185      | 1.2         |
| 223343_at   | MS4A7       | 0.0010506      | 1.2         | 225602_at    | C9orf19     | 0.0004493      | 1.2         |
| 212646_at   | RFTN1       | 0.0000613      | 1.2         | 204642_at    | EDG1        | 0.0011826      | 1.2         |
| 213021_at   | GOSR1       | 0.0001127      | 1.2         | 228330_at    | C6orf113    | 0.0009264      | 1.2         |
| 224927_at   | KIAA1949    | 0.0003364      | 1.2         | 221652_s_at  | C12orf11    | 0.0009277      | 1.2         |
| 224962_at   | C9orf69     | 0.0002568      | 1.2         | 226843_s_at  | PAPD5       | 0.0005357      | 1.2         |
| 224963_at   | SLC26A2     | 0.0004418      | 1.2         | 219492_at    | CHIC2       | 0.0005033      | 1.2         |
| 201582_at   | SEC23B      | 0.0011604      | 1.2         | 225263_at    | HS6ST1      | 0.0009186      | 1.2         |
| 203231_s_at | ATXN1       | 0.0002746      | 1.2         | 202256_at    | CD2BP2      | 0.0007281      | 1.2         |
| 218643_s_at | CRIP1       | 0.0011427      | 1.2         | 210465_s_at  | SNAPC3      | 0.0002893      | 1.2         |
| 220005_at   | P2RY13      | 0.000079       | 1.2         | 219266_at    | ZNF350      | 0.0007828      | 1.2         |
| 206369_s_at | PIK3CG      | 0.0005373      | 1.2         | 1554365_a_at | PPP2R5C     | 0.0004751      | 1.2         |
| 220933_s_at | ZCCHC6      | 0.0011907      | 1.2         | 225024_at    | C20orf77    | 0.0004697      | 1.2         |
| 212548_s_at | FRYL        | 0.0007244      | 1.2         | 217957_at    | C16orf80    | 0.0003937      | 1.2         |
| 201087_at   | PXN         | 0.0000622      | 1.2         | 200699_at    | KDEL2       | 0.0011552      | 1.2         |
| 202195_s_at | TMED5       | 0.0003905      | 1.2         | 204346_s_at  | RASSF1      | 0.0011811      | 1.2         |
| 200759_x_at | NFE2L1      | 0.0000879      | 1.2         | 202307_s_at  | TAP1        | 0.0008533      | 1.2         |
| 223639_s_at | ZNRD1       | 0.0002218      | 1.2         | 200601_at    | ACTN4       | 0.0005128      | 1.2         |

| Probe set    | Gene symbol | t-test p-value | Fold Change | Probe set    | Gene symbol  | t-test p-value | Fold Change |
|--------------|-------------|----------------|-------------|--------------|--------------|----------------|-------------|
| 219033_at    | PARP8       | 0.0002395      | 1.2         | 225866_at    | BXDC1        | 0.000782       | 0.8         |
| 203730_s_at  | ZKSCAN5     | 0.0002636      | 1.2         | 205285_s_at  | FYB          | 0.0004159      | 0.8         |
| 201315_x_at  | IFITM2      | 0.0003053      | 1.2         | 225704_at    | KIAA1545     | 0.0004785      | 0.8         |
| 202610_s_at  | MED14       | 0.0004865      | 1.2         | 226382_at    | LOC283070    | 0.0008826      | 0.8         |
| 225929_s_at  | RNF213      | 0.0008251      | 1.2         | 214219_x_at  | MAP4K1       | 0.0002752      | 0.8         |
| 235440_at    | SPTY2D1     | 0.0010388      | 1.2         | 202259_s_at  | RP11-298P3.3 | 0.0009496      | 0.8         |
| 222543_at    | DERL1       | 0.0005992      | 1.2         | 212914_at    | CBX7         | 0.0002051      | 0.8         |
| 225564_at    | SPATA13     | 0.0010964      | 1.2         | 1555960_at   | HINT1        | 0.0005744      | 0.8         |
| 201012_at    | ANXA1       | 0.0002165      | 1.2         | 217736_s_at  | EIF2AK1      | 0.0010204      | 0.8         |
| 218474_s_at  | KCTD5       | 0.0006947      | 1.2         | 228674_s_at  | EML4         | 0.0010732      | 0.8         |
| 226748_at    | LYSMD2      | 0.0006505      | 1.2         | 228106_at    | C4orf30      | 0.0011808      | 0.8         |
| 232229_at    | SETX        | 0.0010317      | 1.2         | 201377_at    | UBAP2L       | 0.0005852      | 0.8         |
| 208093_s_at  | NDEL1       | 0.0004719      | 1.2         | 235005_at    | DIS3L        | 0.0006257      | 0.8         |
| 218055_s_at  | WDR41       | 0.0010988      | 1.2         | 213357_at    | GTF2H5       | 0.000598       | 0.8         |
| 201807_at    | VPS26A      | 0.0009043      | 1.2         | 214009_at    | MSL3L1       | 0.0002725      | 0.8         |
| 225434_at    | DEDD2       | 0.0005367      | 1.2         | 211009_s_at  | ZNF271       | 0.0005509      | 0.8         |
| 202814_s_at  | HEXIM1      | 0.0008534      | 1.2         | 224664_at    | C10orf104    | 0.0005171      | 0.8         |
| 209879_at    | SELPLG      | 0.0011604      | 1.2         | 228131_at    | ERCC1        | 0.0007289      | 0.8         |
| 207319_s_at  | CDC2L5      | 0.0009571      | 1.2         | 222894_x_at  | C20orf7      | 0.0003748      | 0.8         |
| 202187_s_at  | PPP2R5A     | 0.001141       | 1.2         | 226017_at    | CMTM7        | 0.0004311      | 0.8         |
| 200046_at    | DAD1        | 0.0011852      | 0.9         | 1568658_at   | LOC339804    | 0.0008806      | 0.8         |
| 204215_at    | C7orf23     | 0.001          | 0.9         | 213587_s_at  | ATP6V0E2     | 0.0007766      | 0.8         |
| 221774_x_at  | FAM48A      | 0.0009547      | 0.9         | 228736_at    | HEL308       | 0.0008814      | 0.8         |
| 225170_at    | WDR5        | 0.0009174      | 0.9         | 231713_s_at  | ELP2         | 0.0003111      | 0.8         |
| 213593_s_at  | TRA2A       | 0.0009622      | 0.9         | 223063_at    | C1orf198     | 0.0011147      | 0.8         |
| 218505_at    | WDR59       | 0.001114       | 0.9         | 201161_s_at  | CSDA         | 0.0009498      | 0.8         |
| 229686_at    | P2RY8       | 0.0007739      | 0.9         | 200940_s_at  | RERE         | 0.0007294      | 0.8         |
| 229119_s_at  | ZSWIM7      | 0.00098        | 0.9         | 226923_at    | SCFD2        | 0.0011083      | 0.8         |
| 225435_at    | SSR1        | 0.0010908      | 0.9         | 224666_at    | NSMCE1       | 0.000282       | 0.8         |
| 223421_at    | CYHR1       | 0.000982       | 0.9         | 210006_at    | ABHD14A      | 0.0008413      | 0.8         |
| 207522_s_at  | ATP2A3      | 0.0008972      | 0.8         | 202144_s_at  | ADSL         | 0.0011807      | 0.8         |
| 213340_s_at  | KIAA0495    | 0.000138       | 0.8         | 226801_s_at  | C1orf80      | 0.0006081      | 0.8         |
| 201421_s_at  | WDR77       | 0.0001175      | 0.8         | 212611_at    | DTX4         | 0.0011802      | 0.8         |
| 224821_at    | ABHD14B     | 0.0008749      | 0.8         | 213189_at    | MINA         | 0.0005903      | 0.8         |
| 227677_at    | JAK3        | 0.0002518      | 0.8         | 203655_at    | XRCC1        | 0.0005421      | 0.8         |
| 223598_at    | RAD23B      | 0.0009673      | 0.8         | 217783_s_at  | YPEL5        | 0.0000815      | 0.8         |
| 218495_at    | UXT         | 0.0011408      | 0.8         | 206848_at    | HOXA7        | 0.0010173      | 0.8         |
| 207625_s_at  | CBFA2T2     | 0.000481       | 0.8         | 223389_s_at  | ZNF581       | 0.0009747      | 0.8         |
| 218953_s_at  | PCYOX1L     | 0.001099       | 0.8         | 204650_s_at  | APBB3        | 0.0003337      | 0.8         |
| 200779_at    | ATF4        | 0.0008771      | 0.8         | 210113_s_at  | NLRP1        | 0.0005576      | 0.8         |
| 206707_x_at  | C6orf32     | 0.0001667      | 0.8         | 218951_s_at  | PLCXD1       | 0.0003669      | 0.8         |
| 231896_s_at  | DENR        | 0.0006525      | 0.8         | 225273_at    | WWC3         | 0.0003541      | 0.8         |
| 203580_s_at  | SLC7A6      | 0.0003582      | 0.8         | 1553218_a_at | ZNF512       | 0.0001126      | 0.8         |
| 208622_s_at  | EZR         | 0.0005002      | 0.8         | 219767_s_at  | CRYZL1       | 0.0010052      | 0.8         |
| 221691_x_at  | NPM1        | 0.0010233      | 0.8         | 218802_at    | CCDC109B     | 0.0005326      | 0.8         |
| 203537_at    | PRPSAP2     | 0.0010666      | 0.8         | 227847_at    | EPM2AIP1     | 0.0011003      | 0.8         |
| 221726_at    | RPL22       | 0.0010683      | 0.8         | 211930_at    | HNRPA3       | 0.0004282      | 0.8         |
| 204978_at    | SFRS16      | 0.000434       | 0.8         | 213564_x_at  | LDHB         | 0.0005938      | 0.8         |
| 201770_at    | SNRPA       | 0.0005516      | 0.8         | 201708_s_at  | NIPSNAP1     | 0.0010327      | 0.8         |
| 1557053_s_at | UBE2G2      | 0.0009094      | 0.8         | 214146_s_at  | PPBP         | 0.0005641      | 0.8         |



| Probe set   | Gene symbol   | t-test p-value | Fold Change | Probe set    | Gene symbol | t-test p-value | Fold Change |
|-------------|---------------|----------------|-------------|--------------|-------------|----------------|-------------|
| 235116_at   | TRAF1         | 0.0008707      | <b>0.8</b>  | 235276_at    | EPSTI1      | 0.0002512      | <b>0.8</b>  |
| 201892_s_at | IMPDH2        | 0.0008459      | <b>0.8</b>  | 40446_at     | PHF1        | 0.0000975      | <b>0.8</b>  |
| 231828_at   | LOC253039     | 0.0003287      | <b>0.8</b>  | 221216_s_at  | SCMH1       | 0.0010672      | <b>0.8</b>  |
| 224719_s_at | C12orf57      | 0.0004515      | <b>0.8</b>  | 201605_x_at  | CNN2        | 0.0000194      | <b>0.8</b>  |
| 210097_s_at | NOL7          | 0.0001755      | <b>0.8</b>  | 210268_at    | NFX1        | 0.0011277      | <b>0.8</b>  |
| 201528_at   | RPA1          | 0.0001357      | <b>0.8</b>  | 202690_s_at  | SNRPD1      | 0.0001355      | <b>0.8</b>  |
| 227580_s_at | DKFZP434B0335 | 0.000095       | <b>0.8</b>  | 223218_s_at  | NFKBIZ      | 0.0002958      | <b>0.8</b>  |
| 227722_at   | RPS23         | 0.0002824      | <b>0.8</b>  | 200972_at    | TSPAN3      | 0.0001306      | <b>0.8</b>  |
| 202813_at   | TARBP1        | 0.0002002      | <b>0.8</b>  | 212018_s_at  | RSL1D1      | 0.0001861      | <b>0.8</b>  |
| 225982_at   | UBTF          | 0.0008263      | <b>0.8</b>  | 218316_at    | TIMM9       | 0.0003441      | <b>0.8</b>  |
| 210875_s_at | ZEB1          | 0.0006868      | <b>0.8</b>  | 225693_s_at  | CAMTA1      | 0.0001269      | <b>0.8</b>  |
| 212573_at   | ENDOD1        | 0.0002638      | <b>0.8</b>  | 203620_s_at  | FCHSD2      | 0.0006741      | <b>0.8</b>  |
| 225909_at   | tcag7.1196    | 0.0009585      | <b>0.8</b>  | 218425_at    | RNF216      | 0.0008699      | <b>0.8</b>  |
| 1555981_at  | C17orf65      | 0.0003467      | <b>0.8</b>  | 1554661_s_at | C1orf71     | 0.000217       | <b>0.8</b>  |
| 224712_x_at | C19orf42      | 0.0005941      | <b>0.8</b>  | 212739_s_at  | NME4        | 0.0002692      | <b>0.8</b>  |
| 226413_at   | LOC400027     | 0.00058        | <b>0.8</b>  | 217734_s_at  | WDR6        | 0.0007753      | <b>0.8</b>  |
| 226482_s_at | hCG_20857     | 0.0001467      | <b>0.8</b>  | 203305_at    | F13A1       | 0.000583       | <b>0.8</b>  |
| 202168_at   | TAF9          | 0.0007182      | <b>0.8</b>  | 205353_s_at  | PEBP1       | 0.0002514      | <b>0.8</b>  |
| 232488_at   | AGXT2L2       | 0.0001802      | <b>0.8</b>  | 226732_at    | RBM33       | 0.000076       | <b>0.8</b>  |
| 220942_x_at | C3orf28       | 0.0000731      | <b>0.8</b>  | 208804_s_at  | SFRS6       | 0.0006092      | <b>0.8</b>  |
| 205988_at   | CD84          | 0.0000674      | <b>0.8</b>  | 202747_s_at  | ITM2A       | 0.0009506      | <b>0.8</b>  |
| 234339_s_at | GLTSCR2       | 0.0001402      | <b>0.8</b>  | 218253_s_at  | LGTN        | 0.0001705      | <b>0.8</b>  |
| 223247_at   | MED10         | 0.000324       | <b>0.8</b>  | 228566_at    | P15RS       | 0.0005808      | <b>0.8</b>  |
| 202519_at   | MLXIP         | 0.0006749      | <b>0.8</b>  | 227146_at    | QSOX2       | 0.0007573      | <b>0.8</b>  |
| 202900_s_at | NUP88         | 0.0009941      | <b>0.8</b>  | 221764_at    | C19orf22    | 0.0002573      | <b>0.8</b>  |
| 205641_s_at | TRADD         | 0.0001908      | <b>0.8</b>  | 216305_s_at  | C2orf3      | 0.000367       | <b>0.8</b>  |
| 224076_s_at | WHSC1L1       | 0.0002467      | <b>0.8</b>  | 220755_s_at  | C6orf48     | 0.0005597      | <b>0.8</b>  |
| 202500_at   | DNAJB2        | 0.0010828      | <b>0.8</b>  | 233500_x_at  | CLEC2D      | 0.000457       | <b>0.8</b>  |
| 207023_x_at | KRT10         | 0.0001468      | <b>0.8</b>  | 229050_s_at  | SNHG7       | 0.000297       | <b>0.8</b>  |
| 218117_at   | RBX1          | 0.0008351      | <b>0.8</b>  | 209670_at    | TRAC        | 0.0000435      | <b>0.8</b>  |
| 226713_at   | CCDC50        | 0.0007541      | <b>0.8</b>  | 227751_at    | PDCD5       | 0.0006716      | <b>0.8</b>  |
| 217988_at   | CCNB1IP1      | 0.00027        | <b>0.8</b>  | 222437_s_at  | VPS24       | 0.000117       | <b>0.8</b>  |
| 210749_x_at | DDR1          | 0.0011387      | <b>0.8</b>  | 201623_s_at  | DARS        | 0.0001284      | <b>0.8</b>  |
| 202165_at   | PPP1R2        | 0.0000266      | <b>0.8</b>  | 1557966_x_at | MTERFD2     | 0.0001967      | <b>0.8</b>  |
| 201259_s_at | SYPL1         | 0.0002077      | <b>0.8</b>  | 224610_at    | SNHG1       | 0.0001599      | <b>0.8</b>  |
| 213039_at   | ARHGEF18      | 0.0001617      | <b>0.8</b>  | 221039_s_at  | DDEF1       | 0.0002334      | <b>0.8</b>  |
| 200622_x_at | CALM3         | 0.000726       | <b>0.8</b>  | 211105_s_at  | NFATC1      | 0.0005048      | <b>0.8</b>  |
| 205213_at   | CENTB1        | 0.0002135      | <b>0.8</b>  | 206390_x_at  | PF4         | 0.0000324      | <b>0.8</b>  |
| 224735_at   | CYBASC3       | 0.000113       | <b>0.8</b>  | 212386_at    | TCF4        | 0.0005339      | <b>0.8</b>  |
| 213598_at   | KIF2A         | 0.0006296      | <b>0.8</b>  | 204192_at    | CD37        | 0.0000817      | <b>0.8</b>  |
| 214369_s_at | RASGRP2       | 0.0000783      | <b>0.8</b>  | 204718_at    | EPHB6       | 0.0002541      | <b>0.8</b>  |
| 32836_at    | AGPAT1        | 0.0011338      | <b>0.8</b>  | 227560_at    | SFXN2       | 0.000901       | <b>0.8</b>  |
| 213539_at   | CD3D          | 0.0009269      | <b>0.8</b>  | 78383_at     | TOPORS      | 0.0003969      | <b>0.8</b>  |
| 225507_at   | SFRS18        | 0.0001168      | <b>0.8</b>  | 219563_at    | C14orf139   | 0.0010464      | <b>0.8</b>  |
| 223251_s_at | ANKRD10       | 0.0005274      | <b>0.8</b>  | 228298_at    | FAM113B     | 0.0000574      | <b>0.8</b>  |
| 219698_s_at | METTL4        | 0.001026       | <b>0.8</b>  | 214093_s_at  | FUBP1       | 0.001186       | <b>0.8</b>  |
| 210336_x_at | MZF1          | 0.0009731      | <b>0.8</b>  | 229393_at    | L3MBTL3     | 0.0005265      | <b>0.8</b>  |
| 201577_at   | NME1          | 0.0005111      | <b>0.8</b>  | 220609_at    | LOC202181   | 0.0002329      | <b>0.8</b>  |
| 203802_x_at | NSUN5         | 0.0002896      | <b>0.8</b>  | 218999_at    | TMEM140     | 0.0002714      | <b>0.8</b>  |
| 238480_at   | C18orf50      | 0.0009206      | <b>0.8</b>  | 203725_at    | GADD45A     | 0.000403       | <b>0.8</b>  |

| Probe set    | Gene symbol | t-test p-value | Fold Change | Probe set    | Gene symbol | t-test p-value | Fold Change |
|--------------|-------------|----------------|-------------|--------------|-------------|----------------|-------------|
| 225657_at    | LOC152217   | 0.0007108      | <b>0.8</b>  | 207198_s_at  | LIMS1       | 0.0000815      | <b>0.8</b>  |
| 227852_at    | RP9         | 0.0001159      | <b>0.8</b>  | 231990_at    | USP15       | 0.0002778      | <b>0.8</b>  |
| 219751_at    | SETD6       | 0.0011632      | <b>0.8</b>  | 218829_s_at  | CHD7        | 0.0000639      | <b>0.8</b>  |
| 217825_s_at  | UBE2J1      | 0.0001844      | <b>0.8</b>  | 226106_at    | RNF141      | 0.0009361      | <b>0.8</b>  |
| 227262_at    | HAPLN3      | 0.0000636      | <b>0.8</b>  | 223028_s_at  | SNX9        | 0.0003608      | <b>0.8</b>  |
| 213326_at    | VAMP1       | 0.0000587      | <b>0.8</b>  | 212071_s_at  | SPTBN1      | 0.0000388      | <b>0.8</b>  |
| 218096_at    | AGPAT5      | 0.0002643      | <b>0.8</b>  | 222696_at    | AXIN2       | 0.0001006      | <b>0.8</b>  |
| 205047_s_at  | ASNS        | 0.0005954      | <b>0.8</b>  | 224693_at    | C20orf108   | 0.000954       | <b>0.8</b>  |
| 207777_s_at  | SP140       | 0.000197       | <b>0.8</b>  | 227450_at    | ERP27       | 0.0000378      | <b>0.8</b>  |
| 218885_s_at  | GALNT12     | 0.0001627      | <b>0.8</b>  | 222423_at    | NDFIP1      | 0.0001718      | <b>0.8</b>  |
| 206074_s_at  | HMGA1       | 0.0000225      | <b>0.8</b>  | 235780_at    | PRKACB      | 0.0001284      | <b>0.8</b>  |
| 211138_s_at  | KMO         | 0.0008258      | <b>0.8</b>  | 209153_s_at  | TCF3        | 0.0000747      | <b>0.8</b>  |
| 223211_at    | HACL1       | 0.0008948      | <b>0.8</b>  | 219359_at    | ATHL1       | 0.0001582      | <b>0.8</b>  |
| 230174_at    | LYPLAL1     | 0.0001092      | <b>0.8</b>  | 205101_at    | CIITA       | 0.0000953      | <b>0.8</b>  |
| 225912_at    | TP53INP1    | 0.0001174      | <b>0.8</b>  | 209729_at    | GAS2L1      | 0.0006872      | <b>0.8</b>  |
| 211727_s_at  | COX11       | 0.00011        | <b>0.8</b>  | 228238_at    | GAS5        | 0.0004085      | <b>0.8</b>  |
| 210988_s_at  | PRUNE       | 0.0004059      | <b>0.8</b>  | 1557737_s_at | NKTR        | 0.0000796      | <b>0.8</b>  |
| 222747_s_at  | SCML1       | 0.0001358      | <b>0.8</b>  | 242304_at    | WIBG        | 0.0001801      | <b>0.8</b>  |
| 225698_at    | C5orf26     | 0.0002073      | <b>0.8</b>  | 235466_s_at  | DISP1       | 0.0001443      | <b>0.8</b>  |
| 203543_s_at  | KLF9        | 0.0009903      | <b>0.8</b>  | 203680_at    | PRKAR2B     | 0.0006462      | <b>0.8</b>  |
| 210379_s_at  | TLK1        | 0.0007333      | <b>0.8</b>  | 215111_s_at  | TSC22D1     | 0.0000944      | <b>0.8</b>  |
| 204352_at    | TRAF5       | 0.0005293      | <b>0.8</b>  | 218012_at    | TSPYL2      | 0.0003453      | <b>0.8</b>  |
| 215440_s_at  | BEX4        | 0.0000389      | <b>0.8</b>  | 208601_s_at  | TUBB1       | 0.0002662      | <b>0.8</b>  |
| 202726_at    | LIG1        | 0.0003138      | <b>0.8</b>  | 228555_at    | CAMK2D      | 0.0000957      | <b>0.8</b>  |
| 202263_at    | CYB5R1      | 0.001011       | <b>0.8</b>  | 225457_s_at  | LOC25845    | 0.0006309      | <b>0.8</b>  |
| 223423_at    | GPR160      | 0.0001618      | <b>0.8</b>  | 204081_at    | NRGN        | 0.0000893      | <b>0.8</b>  |
| 212998_x_at  | HLA-DQB1    | 0.0002754      | <b>0.8</b>  | 233458_at    | POLR3E      | 0.0010918      | <b>0.8</b>  |
| 206181_at    | SLAMF1      | 0.0010146      | <b>0.8</b>  | 203380_x_at  | SFRS5       | 0.0000105      | <b>0.8</b>  |
| 244804_at    | SQSTM1      | 0.000542       | <b>0.8</b>  | 208406_s_at  | GRAP2       | 0.0000545      | <b>0.8</b>  |
| 227414_at    | RHBDD1      | 0.00012        | <b>0.8</b>  | 200811_at    | CIRBP       | 0.000005       | <b>0.8</b>  |
| 1569868_s_at | EME2        | 0.000125       | <b>0.8</b>  | 213995_at    | ATP5S       | 0.0000345      | <b>0.8</b>  |
| 202789_at    | PLCG1       | 0.0000568      | <b>0.8</b>  | 238472_at    | FBXO9       | 0.0004071      | <b>0.8</b>  |
| 223266_at    | ALS2CR2     | 0.0002952      | <b>0.8</b>  | 232594_at    | LOC440498   | 0.0001817      | <b>0.8</b>  |
| 224860_at    | C9orf123    | 0.0007818      | <b>0.8</b>  | 222785_x_at  | C11orf1     | 0.0001897      | <b>0.8</b>  |
| 214157_at    | GNAS        | 0.0005578      | <b>0.8</b>  | 226301_at    | C6orf192    | 0.0003589      | <b>0.8</b>  |
| 234710_s_at  | PARP6       | 0.0002331      | <b>0.8</b>  | 210743_s_at  | CDC14A      | 0.0005133      | <b>0.8</b>  |
| 223471_at    | RAB3IP      | 0.0011402      | <b>0.8</b>  | 217602_at    | PPIA        | 0.0008802      | <b>0.8</b>  |
| 218919_at    | ZFAND1      | 0.0003957      | <b>0.8</b>  | 228020_at    | PTCD3       | 0.0000411      | <b>0.8</b>  |
| 218312_s_at  | ZSCAN18     | 0.0001828      | <b>0.8</b>  | 228702_at    | FLJ43663    | 0.0003933      | <b>0.8</b>  |
| 224060_s_at  | DPH5        | 0.0002357      | <b>0.8</b>  | 240344_x_at  | LYRM7       | 0.0000293      | <b>0.8</b>  |
| 205176_s_at  | ITGB3BP     | 0.0006174      | <b>0.8</b>  | 215275_at    | TRAF3IP3    | 0.0000031      | <b>0.8</b>  |
| 208403_x_at  | MAX         | 0.0000128      | <b>0.8</b>  | 221586_s_at  | E2F5        | 0.0000555      | <b>0.8</b>  |
| 214482_at    | ZBTB25      | 0.0000848      | <b>0.8</b>  | 201952_at    | ALCAM       | 0.0002084      | <b>0.8</b>  |
| 1553719_s_at | ZNF548      | 0.0005807      | <b>0.8</b>  | 225397_at    | CCDC32      | 0.0001345      | <b>0.8</b>  |
| 224734_at    | HMGB1       | 0.0000478      | <b>0.8</b>  | 206254_at    | EGF         | 0.0003425      | <b>0.8</b>  |
| 208637_x_at  | ACTN1       | 0.0000802      | <b>0.8</b>  | 223494_at    | MGEA5       | 0.0001557      | <b>0.8</b>  |
| 226635_at    | LOC401504   | 0.0003024      | <b>0.8</b>  | 217147_s_at  | TRAT1       | 0.0001608      | <b>0.8</b>  |
| 226475_at    | FAM118A     | 0.0003586      | <b>0.8</b>  | 218918_at    | MAN1C1      | 0.0008033      | <b>0.8</b>  |
| 202729_s_at  | LTBP1       | 0.0006304      | <b>0.8</b>  | 231775_at    | TNFRSF10A   | 0.0005085      | <b>0.8</b>  |
| 203685_at    | BCL2        | 0.0006331      | <b>0.8</b>  | 226838_at    | TTC32       | 0.0000171      | <b>0.8</b>  |

| Probe set    | Gene symbol | t-test p-value | Fold Change | Probe set   | Gene symbol | t-test p-value | Fold Change |
|--------------|-------------|----------------|-------------|-------------|-------------|----------------|-------------|
| 215946_x_at  | IGLL3       | 0.000542       | <b>0.8</b>  | 210253_at   | HTATIP2     | 0.0001577      | <b>0.7</b>  |
| 208753_s_at  | NAP1L1      | 0.0002025      | <b>0.8</b>  | 214669_x_at | IGK@        | 0.0000489      | <b>0.7</b>  |
| 212706_at    | RASA4       | 0.0000393      | <b>0.8</b>  | 239193_at   | LOC158301   | 0.0001114      | <b>0.7</b>  |
| 200719_at    | SKP1        | 0.0003958      | <b>0.8</b>  | 205053_at   | PRIM1       | 0.0009094      | <b>0.7</b>  |
| 228392_at    | ZNF302      | 0.000298       | <b>0.8</b>  | 213666_at   | 6-Sep       | 0.0002005      | <b>0.7</b>  |
| 213670_x_at  | NSUN5B      | 0.0000156      | <b>0.8</b>  | 1557384_at  | ZNF131      | 0.0001169      | <b>0.7</b>  |
| 207017_at    | RAB27B      | 0.0002467      | <b>0.8</b>  | 219915_s_at | SLC16A10    | 0.0006665      | <b>0.7</b>  |
| 225143_at    | SFXN4       | 0.0003845      | <b>0.8</b>  | 225220_at   | SNHG8       | 0.0000983      | <b>0.7</b>  |
| 221602_s_at  | FAIM3       | 0.0000146      | <b>0.8</b>  | 210538_s_at | BIRC3       | 0.0001183      | <b>0.7</b>  |
| 215332_s_at  | CD8B        | 0.0001814      | <b>0.7</b>  | 204761_at   | USP6NL      | 0.0003967      | <b>0.7</b>  |
| 223809_at    | RGS18       | 0.000058       | <b>0.7</b>  | 235457_at   | MAML2       | 0.0000139      | <b>0.7</b>  |
| 238935_at    | RPS27L      | 0.0000597      | <b>0.7</b>  | 209306_s_at | SWAP70      | 0.0002814      | <b>0.7</b>  |
| 201559_s_at  | CLIC4       | 0.0000584      | <b>0.7</b>  | 223298_s_at | NT5C3       | 0.0000076      | <b>0.7</b>  |
| 223522_at    | C9orf45     | 0.0007215      | <b>0.7</b>  | 203387_s_at | TBC1D4      | 0.0000595      | <b>0.7</b>  |
| 215492_x_at  | PTCRA       | 0.0002676      | <b>0.7</b>  | 202371_at   | TCEAL4      | 0.0002119      | <b>0.7</b>  |
| 230380_at    | THAP2       | 0.0007976      | <b>0.7</b>  | 226879_at   | HVCN1       | 0.0000241      | <b>0.7</b>  |
| 232001_at    | LOC439949   | 0.0000966      | <b>0.7</b>  | 218640_s_at | PLEKHF2     | 0.0002246      | <b>0.7</b>  |
| 1555888_at   | UBR5        | 0.0003619      | <b>0.7</b>  | 214060_at   | SSBP1       | 0.0001035      | <b>0.7</b>  |
| 218149_s_at  | ZNF395      | 0.0000746      | <b>0.7</b>  | 224027_at   | CCL28       | 0.0001176      | <b>0.7</b>  |
| 230489_at    | CD5         | 0.0002639      | <b>0.7</b>  | 225237_s_at | MSI2        | 0.0001429      | <b>0.7</b>  |
| 215967_s_at  | LY9         | 0.0000095      | <b>0.7</b>  | 232141_at   | U2AF1       | 0.0000423      | <b>0.7</b>  |
| 238929_at    | SFRS2B      | 0.000057       | <b>0.7</b>  | 219077_s_at | WVOX        | 0.0002858      | <b>0.7</b>  |
| 221264_s_at  | TARDBP      | 0.0000112      | <b>0.7</b>  | 1554522_at  | CNNM2       | 0.000669       | <b>0.7</b>  |
| 204773_at    | IL11RA      | 0.0003965      | <b>0.7</b>  | 205659_at   | HDAC9       | 0.0003592      | <b>0.7</b>  |
| 204119_s_at  | ADK         | 0.0005678      | <b>0.7</b>  | 214519_s_at | RLN2        | 0.0001703      | <b>0.7</b>  |
| 213502_x_at  | LOC91316    | 0.0009718      | <b>0.7</b>  | 226650_at   | ZFAND2A     | 0.0000777      | <b>0.7</b>  |
| 204936_at    | MAP4K2      | 0.0002875      | <b>0.7</b>  | 228259_s_at | EPB41L4A    | 0.0000471      | <b>0.7</b>  |
| 205135_s_at  | NUFIP1      | 0.0007968      | <b>0.7</b>  | 209806_at   | HIST1H2BK   | 0.0001732      | <b>0.7</b>  |
| 226122_at    | PLEKHG1     | 0.0007427      | <b>0.7</b>  | 1553842_at  | CXorf20     | 0.0004353      | <b>0.7</b>  |
| 230656_s_at  | CIRH1A      | 0.000016       | <b>0.7</b>  | 201656_at   | ITGA6       | 0.0002282      | <b>0.7</b>  |
| 227708_at    | EEF1A1      | 0.0002196      | <b>0.7</b>  | 221790_s_at | LDLRAP1     | 0.0000259      | <b>0.7</b>  |
| 223178_s_at  | NT5DC1      | 0.0003442      | <b>0.7</b>  | 204319_s_at | RGS10       | 0.0000366      | <b>0.7</b>  |
| 219423_x_at  | TNFRSF25    | 0.0009294      | <b>0.7</b>  | 222573_s_at | SAV1        | 0.0000087      | <b>0.7</b>  |
| 228630_at    | ZNF84       | 0.0000792      | <b>0.7</b>  | 208914_at   | GGA2        | 0.0000538      | <b>0.7</b>  |
| 227451_s_at  | CCDC90A     | 0.0000164      | <b>0.7</b>  | 239272_at   | MMP28       | 0.0011502      | <b>0.7</b>  |
| 238669_at    | PTGS1       | 0.0004508      | <b>0.7</b>  | 206176_at   | BMP6        | 0.0005119      | <b>0.7</b>  |
| 210357_s_at  | SMOX        | 0.0008447      | <b>0.7</b>  | 225613_at   | MAST4       | 0.0000042      | <b>0.7</b>  |
| 223231_at    | TATDN1      | 0.0004751      | <b>0.7</b>  | 200665_s_at | SPARC       | 0.0001201      | <b>0.7</b>  |
| 228543_at    | CSRP2BP     | 0.0004313      | <b>0.7</b>  | 218935_at   | EHD3        | 0.000026       | <b>0.7</b>  |
| 214933_at    | CACNA1A     | 0.0003901      | <b>0.7</b>  | 232392_at   | SFRS3       | 0.0001147      | <b>0.7</b>  |
| 236841_at    | FAM39DP     | 0.0004287      | <b>0.7</b>  | 209911_x_at | HIST1H2BD   | 0.0007177      | <b>0.7</b>  |
| 205005_s_at  | NMT2        | 0.0000226      | <b>0.7</b>  | 228217_s_at | C6orf86     | 0.0000677      | <b>0.7</b>  |
| 213460_x_at  | NSUN5C      | 0.0000398      | <b>0.7</b>  | 222858_s_at | DAPP1       | 0.0000047      | <b>0.7</b>  |
| 230509_at    | SNX22       | 0.0000573      | <b>0.7</b>  | 217882_at   | TMEM111     | 0.0000115      | <b>0.7</b>  |
| 219228_at    | ZNF331      | 0.0001125      | <b>0.7</b>  | 200965_s_at | ABLIM1      | 0.0000055      | <b>0.7</b>  |
| 211208_s_at  | CASK        | 0.0007563      | <b>0.7</b>  | 223936_s_at | FOXP1       | 0.0000351      | <b>0.7</b>  |
| 1554250_s_at | TRIM73      | 0.0000086      | <b>0.7</b>  | 229007_at   | LOC283788   | 0.0007438      | <b>0.7</b>  |
| 238860_at    | C6orf130    | 0.0000508      | <b>0.7</b>  | 39248_at    | AQP3        | 0.0000292      | <b>0.7</b>  |
| 230747_s_at  | C18orf17    | 0.0006221      | <b>0.7</b>  | 204115_at   | GNG11       | 0.0001714      | <b>0.7</b>  |
| 224634_at    | GPATCH4     | 0.0010828      | <b>0.7</b>  | 220007_at   | METTL8      | 0.0011782      | <b>0.7</b>  |

| Probe set    | Gene symbol | t-test p-value | Fold Change | Probe set    | Gene symbol | t-test p-value | Fold Change |
|--------------|-------------|----------------|-------------|--------------|-------------|----------------|-------------|
| 217950_at    | NOSIP       | 0.0000404      | 0.7         | 232311_at    | B2M         | 0.0002119      | 0.7         |
| 204466_s_at  | SNCA        | 0.0000035      | 0.7         | 201005_at    | CD9         | 0.0000101      | 0.7         |
| 207078_at    | MED6        | 0.0000083      | 0.7         | 1559739_at   | CHPT1       | 0.0007118      | 0.7         |
| 225314_at    | OCIAD2      | 0.000018       | 0.7         | 214805_at    | EIF4A1      | 0.0000217      | 0.7         |
| 204019_s_at  | SH3YL1      | 0.000001       | 0.7         | 218711_s_at  | SDPR        | 0.0000251      | 0.7         |
| 214823_at    | ZNF204      | 0.0002861      | 0.7         | 222030_at    | SIVA1       | 0.0000759      | 0.7         |
| 209765_at    | ADAM19      | 0.0000689      | 0.7         | 227156_at    | TNRC8       | 0.0000302      | 0.7         |
| 222141_at    | KLHL22      | 0.0008543      | 0.7         | 218510_x_at  | FAM134B     | 0.0004711      | 0.7         |
| 1558290_a_at | PVT1        | 0.0003513      | 0.7         | 226528_at    | MTX3        | 0.0000052      | 0.7         |
| 226018_at    | C7orf41     | 0.0000048      | 0.7         | 227216_at    | RLTPR       | 0.0000859      | 0.7         |
| 206693_at    | IL7         | 0.0006767      | 0.7         | 233543_s_at  | CCDC98      | 0.0009681      | 0.7         |
| 201120_s_at  | PGRMC1      | 0.0000133      | 0.7         | 208051_s_at  | PAIP1       | 0.0003798      | 0.7         |
| 215346_at    | CD40        | 0.0000615      | 0.7         | 212675_s_at  | CEP68       | 0.0001331      | 0.7         |
| 214252_s_at  | CLN5        | 0.0008444      | 0.7         | 204993_at    | GNAZ        | 0.0000066      | 0.7         |
| 208791_at    | CLU         | 0.0000598      | 0.7         | 226496_at    | ZCCHC7      | 0.0000911      | 0.7         |
| 212400_at    | FAM102A     | 0.0000007      | 0.7         | 206337_at    | CCR7        | 0.0000015      | 0.7         |
| 220485_s_at  | SIRPG       | 0.0003245      | 0.7         | 208149_x_at  | DDX11       | 0.0000003      | 0.7         |
| 229597_s_at  | WDFY4       | 0.0000109      | 0.7         | 231721_at    | JAM3        | 0.0009173      | 0.7         |
| 208501_at    | GFI1B       | 0.0007462      | 0.7         | 1557828_a_at | LOC646916   | 0.0001633      | 0.7         |
| 214308_s_at  | HGD         | 0.0003009      | 0.7         | 216207_x_at  | IGKV1D-13   | 0.0000971      | 0.7         |
| 221989_at    | RPL10       | 0.000025       | 0.7         | 211355_x_at  | LEPR        | 0.0009263      | 0.7         |
| 222892_s_at  | TMEM40      | 0.0002193      | 0.7         | 238365_s_at  | MGC33556    | 0.0000166      | 0.7         |
| 227088_at    | PDE5A       | 0.0002973      | 0.7         | 213093_at    | PRKCA       | 0.0000714      | 0.7         |
| 209790_s_at  | CASP6       | 0.0000128      | 0.7         | 201689_s_at  | TPD52       | 0.000122       | 0.7         |
| 215071_s_at  | HIST1H2AC   | 0.0000073      | 0.7         | 231863_at    | ING3        | 0.000979       | 0.7         |
| 1560741_at   | SNRPN       | 0.0000036      | 0.7         | 1569392_at   | GPSN2       | 0.0005326      | 0.7         |
| 222307_at    | LOC282997   | 0.0000582      | 0.7         | 228549_at    | TMEM63A     | 0.0000335      | 0.7         |
| 214081_at    | PLXDC1      | 0.0003287      | 0.7         | 240282_at    | WDR1        | 0.0004879      | 0.7         |
| 209321_s_at  | ADCY3       | 0.0001676      | 0.7         | 223401_at    | C17orf48    | 0.0000026      | 0.7         |
| 205283_at    | FKTN        | 0.0002946      | 0.7         | 237180_at    | PSME4       | 0.000061       | 0.7         |
| 206150_at    | CD27        | 0.0000048      | 0.7         | 227670_at    | ZNF75A      | 0.0000222      | 0.7         |
| 206414_s_at  | DDEF2       | 0.0004237      | 0.7         | 242600_at    | FRMD3       | 0.0000417      | 0.7         |
| 226791_at    | KIFC2       | 0.0000988      | 0.7         | 208523_x_at  | HIST1H2BI   | 0.0000768      | 0.7         |
| 237746_at    | SFRS11      | 0.0004652      | 0.7         | 219724_s_at  | KIAA0748    | 0.0003721      | 0.7         |
| 203146_s_at  | GABBR1      | 0.0000283      | 0.7         | 207339_s_at  | LTB         | 0.0000006      | 0.7         |
| 228109_at    | RASGRF2     | 0.0010102      | 0.7         | 201058_s_at  | MYL9        | 0.0000746      | 0.7         |
| 200790_at    | ODC1        | 0.0000042      | 0.7         | 232618_at    | CYorf15A    | 0.0001211      | 0.7         |
| 235662_at    | CCDC104     | 0.0003         | 0.7         | 210607_at    | FLT3LG      | 0.0000059      | 0.7         |
| 214039_s_at  | LAPTM4B     | 0.0001569      | 0.7         | 230833_at    | ACRBP       | 0.0000817      | 0.7         |
| 235587_at    | LOC202781   | 0.0000298      | 0.7         | 229307_at    | ANKRD28     | 0.0000119      | 0.7         |
| 1556597_a_at | LOC284513   | 0.0010557      | 0.7         | 206857_s_at  | FKBP1B      | 0.0010436      | 0.7         |
| 203123_s_at  | SLC11A2     | 0.000348       | 0.7         | 226419_s_at  | FLJ44342    | 0.0000282      | 0.7         |
| 218100_s_at  | IFT57       | 0.0003654      | 0.7         | 204805_s_at  | H1FX        | 0.0001033      | 0.7         |
| 227686_at    | OXNAD1      | 0.0000039      | 0.7         | 211643_x_at  | HLA-C       | 0.000031       | 0.7         |
| 212651_at    | RHOBTB1     | 0.0011277      | 0.7         | 216956_s_at  | ITGA2B      | 0.0003815      | 0.7         |
| 217235_x_at  | RPL14       | 0.0000885      | 0.7         | 230942_at    | CMTM5       | 0.000091       | 0.7         |
| 210987_x_at  | TPM1        | 0.0005338      | 0.7         | 1559964_at   | FLJ38717    | 0.0009535      | 0.7         |
| 228568_at    | Gcom1       | 0.0000044      | 0.7         | 1552634_a_at | ZNF101      | 0.0000516      | 0.7         |
| 208690_s_at  | PDLIM1      | 0.0000017      | 0.7         | 204026_s_at  | ZWINT       | 0.0002795      | 0.7         |
| 224391_s_at  | SIAE        | 0.0002248      | 0.7         | 222528_s_at  | SLC25A37    | 0.0000607      | 0.7         |

| Probe set    | Gene symbol | t-test p-value | Fold Change | Probe set    | Gene symbol | t-test p-value | Fold Change |
|--------------|-------------|----------------|-------------|--------------|-------------|----------------|-------------|
| 1563498_s_at | SLC25A45    | 0.0000089      | 0.7         | 205376_at    | INPP4B      | 0.0001104      | 0.7         |
| 235526_at    | SOX6        | 0.0000274      | 0.7         | 240052_at    | ITPR1       | 0.0003139      | 0.7         |
| 204793_at    | GPRASP1     | 0.0002458      | 0.7         | 203865_s_at  | ADARB1      | 0.0000001      | 0.7         |
| 220936_s_at  | H2AFJ       | 0.0006084      | 0.7         | 236226_at    | BTLA        | 0.0006974      | 0.7         |
| 212966_at    | HIC2        | 0.0001276      | 0.7         | 1554306_at   | ITPKB       | 0.0000826      | 0.7         |
| 1562831_a_at | LOC283089   | 0.0000037      | 0.7         | 240513_at    | EIF3M       | 0.0002234      | 0.7         |
| 226152_at    | TTC7B       | 0.0006786      | 0.7         | 201313_at    | ENO2        | 0.0000576      | 0.7         |
| 241871_at    | CAMK4       | 0.0003302      | 0.7         | 228003_at    | RAB30       | 0.0002884      | 0.7         |
| 65585_at     | FAM86B1     | 0.0001625      | 0.7         | 243213_at    | STAT3       | 0.0006038      | 0.7         |
| 226452_at    | PDK1        | 0.0000275      | 0.7         | 225775_at    | TSPAN33     | 0.0000005      | 0.7         |
| 57588_at     | SLC24A3     | 0.0006304      | 0.7         | 202431_s_at  | MYC         | 0.0000001      | 0.7         |
| 228999_at    | CHD2        | 0.0000598      | 0.7         | 227182_at    | SUSD3       | 0.0000086      | 0.6         |
| 209398_at    | HIST1H1C    | 0.0001705      | 0.7         | 1565651_at   | ARF1        | 0.0000135      | 0.6         |
| 206167_s_at  | ARHGAP6     | 0.0003557      | 0.7         | 232441_at    | KRR1        | 0.0000015      | 0.6         |
| 212311_at    | KIAA0746    | 0.0000004      | 0.7         | 215567_at    | FCF1        | 0.000317       | 0.6         |
| 235594_at    | SCYE1       | 0.0006413      | 0.7         | 235010_at    | LOC729013   | 0.0000065      | 0.6         |
| 223777_at    | MGC13005    | 0.0000168      | 0.7         | 219513_s_at  | SH2D3A      | 0.0000118      | 0.6         |
| 223565_at    | MGC29506    | 0.0004739      | 0.7         | 228831_s_at  | GNG7        | 0.0000014      | 0.6         |
| 1555476_at   | IREB2       | 0.0003553      | 0.7         | 243880_at    | GOSR2       | 0.0002089      | 0.6         |
| 217080_s_at  | HOMER2      | 0.0009331      | 0.7         | 205861_at    | SPIB        | 0.0000001      | 0.6         |
| 227622_at    | PCF11       | 0.0000039      | 0.7         | 1554918_a_at | ABCC4       | 0.0010288      | 0.6         |
| 336_at       | TBXA2R      | 0.0002172      | 0.7         | 208527_x_at  | HIST1H2BE   | 0.0000181      | 0.6         |
| 1570571_at   | CCDC91      | 0.0000085      | 0.7         | 210493_s_at  | MFAP3L      | 0.0001021      | 0.6         |
| 207156_at    | HIST1H2AG   | 0.0005999      | 0.7         | 202708_s_at  | HIST2H2BE   | 0.0000001      | 0.6         |
| 238071_at    | LCN10       | 0.0000415      | 0.7         | 1559078_at   | BCL11A      | 0.0001648      | 0.6         |
| 233198_at    | LOC92497    | 0.0007924      | 0.7         | 204440_at    | CD83        | 0.000327       | 0.6         |
| 225354_s_at  | SH3BGRL2    | 0.0000046      | 0.7         | 211798_x_at  | IGLJ3       | 0.0001283      | 0.6         |
| 235020_at    | TAF4B       | 0.000067       | 0.7         | 229253_at    | THEM4       | 0.0000067      | 0.6         |
| 215833_s_at  | SPPL2B      | 0.0001203      | 0.7         | 230285_at    | SVIP        | 0.0000154      | 0.6         |
| 1569136_at   | MGAT4A      | 0.0010144      | 0.7         | 232436_at    | ZNF274      | 0.0000034      | 0.6         |
| 202555_s_at  | MYLK        | 0.0000035      | 0.7         | 232216_at    | YME1L1      | 0.0000245      | 0.6         |
| 213534_s_at  | PASK        | 0.0000298      | 0.7         | 208022_s_at  | CDC14B      | 0.0000014      | 0.6         |
| 1569484_s_at | MDN1        | 0.0002164      | 0.7         | 202723_s_at  | FOXO1       | 0.0000456      | 0.6         |
| 207815_at    | PF4V1       | 0.0000528      | 0.7         | 226433_at    | RNF157      | 0.0000041      | 0.6         |
| 233380_s_at  | RUFY1       | 0.0000101      | 0.7         | 241844_x_at  | TMEM156     | 0.0002469      | 0.6         |
| 219551_at    | EAF2        | 0.0000066      | 0.7         | 206385_s_at  | ANK3        | 0.0002097      | 0.6         |
| 224367_at    | BEX2        | 0.0000018      | 0.7         | 209504_s_at  | PLEKHB1     | 0.000017       | 0.6         |
| 223946_at    | MED23       | 0.000979       | 0.7         | 214245_at    | RPS14       | 0.0000663      | 0.6         |
| 221756_at    | PIK3IP1     | 0.0000219      | 0.7         | 206126_at    | BLR1        | 0.0005654      | 0.6         |
| 212531_at    | LCN2        | 0.0000337      | 0.7         | 218948_at    | QRSL1       | 0.000175       | 0.6         |
| 218718_at    | PDGFC       | 0.0000056      | 0.7         | 206698_at    | XK          | 0.0007618      | 0.6         |
| 1555659_a_at | TREML1      | 0.00002        | 0.7         | 227180_at    | ELOVL7      | 0.0000395      | 0.6         |
| 229778_at    | C12orf39    | 0.0005         | 0.7         | 242518_at    | LOC729029   | 0.0001449      | 0.6         |
| 211272_s_at  | DGKA        | 0.0000049      | 0.7         | 217963_s_at  | NGFRAP1     | 0.0000013      | 0.6         |
| 201539_s_at  | FHL1        | 0.0000032      | 0.7         | 227867_at    | LOC129293   | 0.000012       | 0.6         |
| 207124_s_at  | GNB5        | 0.0000007      | 0.7         | 217148_x_at  | IGLV2-14    | 0.0000125      | 0.6         |
| 211856_x_at  | CD28        | 0.0002584      | 0.7         | 203413_at    | NELL2       | 0.0000005      | 0.6         |
| 210172_at    | SF1         | 0.0011015      | 0.7         | 222557_at    | STMN3       | 0.0000003      | 0.6         |
| 226258_at    | AMN1        | 0.0000006      | 0.7         | 205254_x_at  | TCF7        | 0.0000088      | 0.6         |
| 211639_x_at  | ARPC1B      | 0.000372       | 0.7         | 220496_at    | CLEC1B      | 0.0000002      | 0.6         |

| Probe set   | Gene symbol | t-test p-value | Fold Change | Probe set    | Gene symbol | t-test p-value | Fold Change |
|-------------|-------------|----------------|-------------|--------------|-------------|----------------|-------------|
| 1570585_at  | MPZL3       | 0.0000348      | 0.6         | 240456_at    | ANKRD55     | 0.0007165      | 0.6         |
| 201502_s_at | NFKBIA      | 0.0000215      | 0.6         | 215779_s_at  | HIST1H2BG   | 0.0000033      | 0.6         |
| 208195_at   | TTN         | 0.0005197      | 0.6         | 241425_at    | NUPL1       | 0.0000089      | 0.6         |
| 232148_at   | NSMAF       | 0.0009202      | 0.6         | 227189_at    | CPNE5       | 0.0000019      | 0.6         |
| 227406_at   | GABPB2      | < 1E-07        | 0.6         | 219471_at    | C13orf18    | 0.0000068      | 0.6         |
| 226611_s_at | PRR6        | 0.0000477      | 0.6         | 211478_s_at  | DPP4        | 0.0005945      | 0.6         |
| 206110_at   | HIST1H3H    | 0.0000018      | 0.6         | 222830_at    | GRHL1       | 0.0006022      | 0.6         |
| 226878_at   | HLA-DOA     | < 1E-07        | 0.6         | 202468_s_at  | CTNNAL1     | 0.0000168      | 0.6         |
| 204612_at   | PKIA        | 0.0000116      | 0.6         | 215101_s_at  | CXCL5       | 0.0000198      | 0.6         |
| 217979_at   | TSPAN13     | 0.0000002      | 0.6         | 215214_at    | IGL@        | 0.0002867      | 0.6         |
| 210948_s_at | LEF1        | 0.0000079      | 0.6         | 223681_s_at  | INADL       | 0.0000295      | 0.6         |
| 207808_s_at | PROS1       | 0.0000549      | 0.6         | 1569872_a_at | LOC650392   | 0.0002495      | 0.6         |
| 213338_at   | TMEM158     | 0.0000072      | 0.6         | 202016_at    | MEST        | 0.0000012      | 0.6         |
| 211998_at   | H3F3B       | 0.0000002      | 0.6         | 233019_at    | CNOT7       | 0.0000029      | 0.6         |
| 209301_at   | CA2         | 0.0000025      | 0.6         | 208546_x_at  | HIST1H2BH   | 0.0000074      | 0.6         |
| 215047_at   | TRIM58      | 0.0000018      | 0.6         | 1562731_s_at | MDS2        | 0.0000002      | 0.6         |
| 225369_at   | ESAM        | 0.0000012      | 0.6         | 1560703_at   | NOS2A       | 0.0000274      | 0.6         |
| 227829_at   | GYLTL1B     | 0.0000149      | 0.6         | 208490_x_at  | HIST1H2BF   | 0.0000049      | 0.6         |
| 217506_at   | LOC400642   | 0.0000183      | 0.6         | 224533_s_at  | IFI6        | 0.0001181      | 0.6         |
| 215850_s_at | NDUFA5      | 0.0005927      | 0.6         | 242201_at    | PMS2L5      | 0.0000004      | 0.6         |
| 205878_at   | POU6F1      | 0.0000008      | 0.6         | 219630_at    | PDZK1IP1    | 0.0001298      | 0.6         |
| 221211_s_at | C21orf7     | 0.0000046      | 0.6         | 227198_at    | AFF3        | 0.0000009      | 0.6         |
| 219871_at   | FLJ13197    | 0.0000015      | 0.6         | 211635_x_at  | IGHV1-69    | 0.0002476      | 0.6         |
| 203233_at   | IL4R        | 0.0000002      | 0.6         | 207655_s_at  | BLNK        | 0.0000017      | 0.6         |
| 244786_at   | SNHG10      | 0.0006968      | 0.6         | 238633_at    | EPC1        | 0.0000204      | 0.6         |
| 215176_x_at | NTN2L       | 0.000032       | 0.6         | 214074_s_at  | CTTN        | 0.0000612      | 0.6         |
| 1560396_at  | KLHL6       | 0.0004894      | 0.6         | 1560274_at   | WTAP        | 0.0000005      | 0.6         |
| 1559993_at  | SFXN3       | 0.000034       | 0.6         | 205511_at    | FLJ10038    | 0.0000915      | 0.6         |
| 1553099_at  | TIGD1       | 0.0000004      | 0.6         | 214469_at    | HIST1H2AE   | 0.0002062      | 0.6         |
| 227641_at   | FBXL16      | 0.0000001      | 0.6         | 236193_at    | HIST1H2BC   | 0.0000186      | 0.6         |
| 205259_at   | NR3C2       | 0.0000299      | 0.6         | 203819_s_at  | IGF2BP3     | 0.0000528      | 0.5         |
| 230609_at   | CLINT1      | 0.0001998      | 0.6         | 204419_x_at  | HBG2        | 0.0009827      | 0.5         |
| 242146_at   | SNRPA1      | 0.0000001      | 0.6         | 232483_at    | MED17       | 0.0000767      | 0.5         |
| 223754_at   | MGC13057    | 0.0000077      | 0.6         | 210448_s_at  | P2RX5       | 0.0000001      | 0.5         |
| 219864_s_at | RCAN3       | 0.0000524      | 0.6         | 204777_s_at  | MAL         | 0.0000016      | 0.5         |
| 204069_at   | MEIS1       | 0.0000064      | 0.6         | 215925_s_at  | CD72        | 0.0000554      | 0.5         |
| 205297_s_at | CD79B       | 0.0000014      | 0.6         | 212225_at    | EIF1        | 0.0000054      | 0.5         |
| 217281_x_at | IL8         | 0.0000171      | 0.6         | 1568815_a_at | DDX50       | 0.0000001      | 0.5         |
| 227412_at   | PPP1R3E     | 0.0000025      | 0.6         | 230529_at    | HECA        | 0.0000003      | 0.5         |
| 1557557_at  | MATN1       | 0.0000418      | 0.6         | 1559399_s_at | ZCCHC10     | 0.0000007      | 0.5         |
| 230123_at   | NECAP2      | 0.0000347      | 0.6         | 232204_at    | EBF1        | 0.0000257      | 0.5         |
| 211637_x_at | LOC652128   | 0.0000374      | 0.6         | 232529_at    | SP3         | 0.0000007      | 0.5         |
| 204838_s_at | MLH3        | 0.0000032      | 0.6         | 230983_at    | FAM129C     | < 1E-07        | 0.5         |
| 220418_at   | UBASH3A     | 0.0002174      | 0.6         | 241762_at    | FBXO32      | 0.0006157      | 0.5         |
| 205544_s_at | CR2         | 0.0000082      | 0.6         | 1568665_at   | RNF103      | 0.0000515      | 0.5         |
| 215240_at   | ITGB3       | 0.0002315      | 0.6         | 212077_at    | CALD1       | 0.0007256      | 0.5         |
| 228377_at   | KLHL14      | 0.0005956      | 0.6         | 212827_at    | IGHM        | < 1E-07        | 0.5         |
| 209840_s_at | LRRN3       | 0.0000048      | 0.6         | 214414_x_at  | HBA2        | 0.0009378      | 0.5         |
| 244523_at   | MMD         | 0.0000007      | 0.6         | 219410_at    | TMEM45A     | 0.0009479      | 0.5         |
| 228047_at   | SNORA72     | 0.0000595      | 0.6         | 205049_s_at  | CD79A       | 0.0000001      | 0.5         |

| Probe set   | Gene symbol | t-test p-value | Fold Change | Probe set   | Gene symbol | t-test p-value | Fold Change |
|-------------|-------------|----------------|-------------|-------------|-------------|----------------|-------------|
| 228381_at   | ATF7IP2     | < 1E-07        | <b>0.5</b>  | 1556062_at  | RPP30       | 0.0000145      | <b>0.5</b>  |
| 220059_at   | STAP1       | 0.0000103      | <b>0.5</b>  | 219983_at   | HRASLS      | 0.0000683      | <b>0.5</b>  |
| 203939_at   | NT5E        | 0.0000003      | <b>0.5</b>  | 1555882_at  | SPIN3       | 0.0000975      | <b>0.4</b>  |
| 236796_at   | BACH2       | 0.0000057      | <b>0.5</b>  | 219737_s_at | PCDH9       | 0.0000005      | <b>0.4</b>  |
| 238738_at   | PSMD7       | 0.0000011      | <b>0.5</b>  | 39318_at    | TCL1A       | < 1E-07        | <b>0.4</b>  |
| 202732_at   | PKIG        | 0.0000001      | <b>0.5</b>  | 231418_at   | MS4A1       | 0.0000018      | <b>0.4</b>  |
| 208268_at   | ADAM28      | 0.0000184      | <b>0.5</b>  | 223751_x_at | TLR10       | 0.0001992      | <b>0.4</b>  |
| 1559975_at  | BTG1        | < 1E-07        | <b>0.5</b>  | 220338_at   | RALGPS2     | 0.000022       | <b>0.4</b>  |
| 229513_at   | STRBP       | 0.0000002      | <b>0.5</b>  | 206398_s_at | CD19        | 0.0000025      | <b>0.4</b>  |
| 205267_at   | POU2AF1     | < 1E-07        | <b>0.5</b>  | 241843_at   | SNORA28     | 0.0000031      | <b>0.4</b>  |
| 219667_s_at | BANK1       | 0.0000012      | <b>0.5</b>  | 204581_at   | CD22        | 0.0000001      | <b>0.4</b>  |
| 208180_s_at | HIST1H4H    | 0.0000019      | <b>0.5</b>  | 221239_s_at | FCRL2       | 0.0000003      | <b>0.4</b>  |
| 1554036_at  | ZBTB24      | 0.0000037      | <b>0.5</b>  | 209116_x_at | HBB         | 0.000672       | <b>0.4</b>  |
| 226150_at   | PPAPDC1B    | 0.0000006      | <b>0.5</b>  | 235982_at   | FCRL1       | 0.000001       | <b>0.4</b>  |
| 224406_s_at | FCRL5       | 0.0000019      | <b>0.5</b>  | 205671_s_at | HLA-DOB     | < 1E-07        | <b>0.4</b>  |
| 225081_s_at | CDCA7L      | < 1E-07        | <b>0.5</b>  | 235278_at   | MACROD2     | 0.0000037      | <b>0.4</b>  |
| 222044_at   | C20orf67    | 0.0009192      | <b>0.5</b>  | 230245_s_at | LOC283663   | 0.0000003      | <b>0.4</b>  |
| 225207_at   | PDK4        | 0.0000012      | <b>0.5</b>  | 220068_at   | VPREB3      | 0.0000004      | <b>0.4</b>  |
| 241819_at   | TNFSF8      | 0.00004        | <b>0.5</b>  | 209583_s_at | CD200       | 0.0000235      | <b>0.4</b>  |
| 206207_at   | CLC         | 0.0004776      | <b>0.5</b>  | 206759_at   | FCER2       | 0.0000146      | <b>0.4</b>  |
| 235400_at   | FCRLA       | 0.0000005      | <b>0.5</b>  | 206478_at   | KIAA0125    | 0.0000166      | <b>0.4</b>  |
| 211745_x_at | HBA1        | 0.0005579      | <b>0.5</b>  | 206255_at   | BLK         | 0.0000003      | <b>0.4</b>  |
| 208650_s_at | CD24        | 0.0000031      | <b>0.5</b>  | 213674_x_at | IGHD        | < 1E-07        | <b>0.4</b>  |
| 219073_s_at | OSBPL10     | < 1E-07        | <b>0.5</b>  | 229070_at   | C6orf105    | 0.0000128      | <b>0.4</b>  |
| 204004_at   | PAWR        | 0.0000126      | <b>0.5</b>  | 1565716_at  | FUS         | 0.0000094      | <b>0.2</b>  |

**Supplementary Table S3-** Thirteen pathways altered by exercise, in late pubertal boys, classified by Kegg

| <b>Natural killer cell mediated cytotoxicity (27 genes)</b> |                                                                                                                       |                    |                       |           |
|-------------------------------------------------------------|-----------------------------------------------------------------------------------------------------------------------|--------------------|-----------------------|-----------|
| <b>Affy ID</b>                                              | <b>Gene Name</b>                                                                                                      | <b>Gene Symbol</b> | <b>t-test p-value</b> | <b>FC</b> |
| 213475_s_at                                                 | <a href="#">integrin, alpha I (antigen cd11a (p180), lymphocyte function-associated antigen 1; alpha polypeptide)</a> | ITGAL              | 0.0011185             | 1.2       |
| 204007_at                                                   | <a href="#">fc fragment of igg, low affinity iiib, receptor (cd16b)</a>                                               | FCGR3B             | 6e-007                | 1.6       |
| 1552263_at                                                  | <a href="#">mitogen-activated protein kinase 1</a>                                                                    | MAPK1              | 3.9e-006              | 1.5       |
| 213093_at                                                   | <a href="#">protein kinase c, alpha</a>                                                                               | PRKCA              | 7.14e-005             | 0.7       |
| 1553681_a_at                                                | <a href="#">perforin 1 (pore forming protein)</a>                                                                     | PRF1               | 3e-007                | 2.1       |
| 210164_at                                                   | <a href="#">granzyme b (granzyme 2, cytotoxic t-lymphocyte-associated serine esterase 1)</a>                          | GZMB               | < 1E-07               | 2.3       |
| 207723_s_at                                                 | <a href="#">killer cell lectin-like receptor subfamily c, member 3</a>                                                | KLRC3              | 2.1e-006              | 1.7       |
| 211333_s_at                                                 | <a href="#">fas ligand (tnf superfamily, member 6)</a>                                                                | FASLG              | < 1E-07               | 4.2       |
| 220307_at                                                   | <a href="#">cd244 natural killer cell receptor 2b4</a>                                                                | CD244              | 1.39e-005             | 1.5       |
| 210031_at                                                   | <a href="#">cd3z antigen, zeta polypeptide (tit3 complex)</a>                                                         | CD247              | 3e-007                | 1.5       |
| 210763_x_at                                                 | <a href="#">natural cytotoxicity triggering receptor 3</a>                                                            | NCR3               | 0.0005172             | 1.4       |
| 1559101_at                                                  | <a href="#">fyn oncogene related to src, fgr, yes</a>                                                                 | FYN                | 4.72e-005             | 1.5       |
| 206247_at                                                   | <a href="#">mhc class i polypeptide-related sequence b</a>                                                            | MICB               | 1.29e-005             | 1.3       |
| 208426_x_at                                                 | <a href="#">killer cell immunoglobulin-like receptor, two domains, long cytoplasmic tail, 4</a>                       | KIR2DL4            | 0.0003046             | 1.7       |
| 208179_x_at                                                 | <a href="#">killer cell immunoglobulin-like receptor, two domains, long cytoplasmic tail, 3</a>                       | KIR2DL3            | < 1E-07               | 3.1       |
| 207314_x_at                                                 | <a href="#">killer cell immunoglobulin-like receptor, three domains, long cytoplasmic tail, 2</a>                     | KIR3DL2            | < 1E-07               | 3.7       |
| 1553176_at                                                  | <a href="#">sh2 domain containing 1b</a>                                                                              | SH2D1B             | 1e-007                | 3.0       |
| 1555691_a_at                                                | <a href="#">killer cell lectin-like receptor subfamily c, member 4</a>                                                | KLRK1              | 0.0002103             | 1.3       |
| 211105_s_at                                                 | <a href="#">nuclear factor of activated t-cells, cytoplasmic, calcineurin-dependent 1</a>                             | NFATC1             | 0.0005048             | 0.8       |
| 206369_s_at                                                 | <a href="#">phosphoinositide-3-kinase, catalytic, gamma polypeptide</a>                                               | PIK3CG             | 0.0005373             | 1.2       |
| 211250_s_at                                                 | <a href="#">sh3-domain binding protein 2</a>                                                                          | SH3BP2             | 0.0002851             | 1.3       |
| 226991_at                                                   | <a href="#">nuclear factor of activated t-cells, cytoplasmic, calcineurin-dependent 2</a>                             | NFATC2             | 0.0001061             | 1.4       |
| 202789_at                                                   | <a href="#">phospholipase c, gamma 1</a>                                                                              | PLCG1              | 5.68e-005             | 0.8       |
| 210606_x_at                                                 | <a href="#">killer cell lectin-like receptor subfamily d, member 1</a>                                                | KLRD1              | 3.2e-006              | 1.9       |
| 211687_x_at                                                 | <a href="#">killer cell immunoglobulin-like receptor, three domains, long cytoplasmic tail, 1</a>                     | KIR3DL1            | < 1E-07               | 2.9       |



|           |                                                                        |           |           |            |
|-----------|------------------------------------------------------------------------|-----------|-----------|------------|
| 231775_at | <a href="#">tumor necrosis factor receptor superfamily, member 10a</a> | TNFRSF10A | 0.0005085 | <b>0.8</b> |
| 207860_at | <a href="#">natural cytotoxicity triggering receptor 1</a>             | NCR1      | 1.69e-005 | <b>1.6</b> |

**Hematopoietic cell lineage (21 genes)**

| Affy ID     | Gene Name                                                                                        | Gene Symbol | t-test p-value | FC         |
|-------------|--------------------------------------------------------------------------------------------------|-------------|----------------|------------|
| 205692_s_at | <a href="#">cd38 antigen (p45)</a>                                                               | CD38        | 2.7e-005       | <b>1.8</b> |
| 208650_s_at | <a href="#">cd24 antigen (small cell lung carcinoma cluster 4 antigen)</a>                       | CD24        | 3.1e-006       | <b>0.5</b> |
| 204773_at   | <a href="#">interleukin 11 receptor, alpha</a>                                                   | IL11RA      | 0.0003965      | <b>0.7</b> |
| 215332_s_at | <a href="#">cd8 antigen, beta polypeptide 1 (p37)</a>                                            | CD8B        | 0.0001814      | <b>0.7</b> |
| 230489_at   | <a href="#">cd5 antigen (p56-62)</a>                                                             | CD5         | 0.0002639      | <b>0.7</b> |
| 213539_at   | <a href="#">cd3d antigen, delta polypeptide (tit3 complex)</a>                                   | CD3D        | 0.0009269      | <b>0.8</b> |
| 216956_s_at | <a href="#">integrin, alpha 2b (platelet glycoprotein iib of iib/iiia complex, antigen cd41)</a> | ITGA2B      | 0.0003815      | <b>0.7</b> |
| 204581_at   | <a href="#">cd22 antigen</a>                                                                     | CD22        | 1e-007         | <b>0.4</b> |
| 201656_at   | <a href="#">integrin, alpha 6</a>                                                                | ITGA6       | 0.0002282      | <b>0.7</b> |
| 201005_at   | <a href="#">cd9 antigen (p24)</a>                                                                | CD9         | 1.01e-005      | <b>0.7</b> |
| 206398_s_at | <a href="#">cd19 antigen</a>                                                                     | CD19        | 2.5e-006       | <b>0.4</b> |
| 215240_at   | <a href="#">integrin, beta 3 (platelet glycoprotein iiia, antigen cd61)</a>                      | ITGB3       | 0.0002315      | <b>0.6</b> |
| 203233_at   | <a href="#">interleukin 4 receptor</a>                                                           | IL4R        | 2e-007         | <b>0.6</b> |
| 206693_at   | <a href="#">interleukin 7</a>                                                                    | IL7         | 0.0006767      | <b>0.7</b> |
| 210607_at   | <a href="#">fms-related tyrosine kinase 3 ligand</a>                                             | FLT3LG      | 5.9e-006       | <b>0.7</b> |
| 231418_at   | <a href="#">membrane-spanning 4-domains, subfamily a, member 1</a>                               | MS4A1       | 1.8e-006       | <b>0.4</b> |
| 206759_at   | <a href="#">fc fragment of ige, low affinity ii, receptor for (cd23a)</a>                        | FCER2       | 1.46e-005      | <b>0.4</b> |
| 214551_s_at | <a href="#">cd7 antigen (p41)</a>                                                                | CD7         | 9.55e-005      | <b>1.3</b> |
| 204192_at   | <a href="#">cd37 antigen</a>                                                                     | CD37        | 8.17e-005      | <b>0.8</b> |
| 205786_s_at | <a href="#">integrin, alpha m (complement component 3 receptor 3 subunit)</a>                    | ITGAM       | 0.0003086      | <b>1.2</b> |
| 205544_s_at | <a href="#">complement component (3d/epstein barr virus) receptor 2</a>                          | CR2         | 8.2e-006       | <b>0.6</b> |

**Antigen processing and presentation (16 genes)**

| Affy ID      | Gene Name                                                                                         | Gene Symbol | t-test p-value | FC         |
|--------------|---------------------------------------------------------------------------------------------------|-------------|----------------|------------|
| 208426_x_at  | <a href="#">killer cell immunoglobulin-like receptor, two domains, long cytoplasmic tail, 4</a>   | KIR2DL4     | 0.0003046      | <b>1.7</b> |
| 215332_s_at  | <a href="#">cd8 antigen, beta polypeptide 1 (p37)</a>                                             | CD8B        | 0.0001814      | <b>0.7</b> |
| 208179_x_at  | <a href="#">killer cell immunoglobulin-like receptor, two domains, long cytoplasmic tail, 3</a>   | KIR2DL3     | < 1E-07        | <b>3.1</b> |
| 207314_x_at  | <a href="#">killer cell immunoglobulin-like receptor, three domains, long cytoplasmic tail, 2</a> | KIR3DL2     | < 1E-07        | <b>3.7</b> |
| 1555691_a_at | <a href="#">killer cell lectin-like receptor subfamily c, member 4</a>                            | KLRK1       | 0.0002103      | <b>1.3</b> |

|             |                                                                                                   |          |           |     |
|-------------|---------------------------------------------------------------------------------------------------|----------|-----------|-----|
| 221978_at   | <a href="#">major histocompatibility complex, class i, f</a>                                      | HLA-F    | 0.0001198 | 1.4 |
| 205671_s_at | <a href="#">major histocompatibility complex, class ii, do beta</a>                               | HLA-DOB  | < 1E-07   | 0.4 |
| 207723_s_at | <a href="#">killer cell lectin-like receptor subfamily c, member 3</a>                            | KLRC3    | 2.1e-006  | 1.7 |
| 202307_s_at | <a href="#">transporter 1, atp-binding cassette, sub-family b (mdr/tap)</a>                       | TAP1     | 0.0008533 | 1.2 |
| 200799_at   | <a href="#">heat shock 70kda protein 1a</a>                                                       | HSPA1A   | 0.0000042 | 1.5 |
| 210606_x_at | <a href="#">killer cell lectin-like receptor subfamily d, member 1</a>                            | KLRD1    | 3.2e-006  | 1.9 |
| 211687_x_at | <a href="#">killer cell immunoglobulin-like receptor, three domains, long cytoplasmic tail, 1</a> | KIR3DL1  | < 1E-07   | 2.9 |
| 226878_at   | <a href="#">major histocompatibility complex, class ii, do alpha</a>                              | HLA-DOA  | < 1E-07   | 0.6 |
| 212998_x_at | <a href="#">major histocompatibility complex, class ii, dq beta 1</a>                             | HLA-DQB1 | 0.0002754 | 0.8 |
| 232311_at   | <a href="#">beta-2-microglobulin</a>                                                              | B2M      | 0.0002119 | 0.7 |
| 205101_at   | <a href="#">class ii, major histocompatibility complex, transactivator</a>                        | CIITA    | 9.53e-005 | 0.8 |

### Cell adhesion molecules (CAMs) (20 genes)

| Affy ID     | Gene Name                                                                                                             | Gene Symbol | t-test p-value | FC  |
|-------------|-----------------------------------------------------------------------------------------------------------------------|-------------|----------------|-----|
| 211856_x_at | <a href="#">cd28 antigen (tp44)</a>                                                                                   | CD28        | 0.0002584      | 0.7 |
| 215332_s_at | <a href="#">cd8 antigen, beta polypeptide 1 (p37)</a>                                                                 | CD8B        | 0.0001814      | 0.7 |
| 213475_s_at | <a href="#">integrin, alpha I (antigen cd11a (p180), lymphocyte function-associated antigen 1; alpha polypeptide)</a> | ITGAL       | 0.0011185      | 1.2 |
| 201952_at   | <a href="#">activated leukocyte cell adhesion molecule</a>                                                            | ALCAM       | 0.0002084      | 0.8 |
| 221978_at   | <a href="#">major histocompatibility complex, class i, f</a>                                                          | HLA-F       | 0.0001198      | 1.4 |
| 205671_s_at | <a href="#">major histocompatibility complex, class ii, do beta</a>                                                   | HLA-DOB     | < 1E-07        | 0.4 |
| 204581_at   | <a href="#">cd22 antigen</a>                                                                                          | CD22        | 1e-007         | 0.4 |
| 201656_at   | <a href="#">integrin, alpha 6</a>                                                                                     | ITGA6       | 0.0002282      | 0.7 |
| 227394_at   | <a href="#">neural cell adhesion molecule 1</a>                                                                       | NCAM1       | 7.4e-005       | 2.7 |
| 209879_at   | <a href="#">selectin p ligand</a>                                                                                     | SELPLG      | 0.0011604      | 1.2 |
| 215346_at   | <a href="#">cd40 antigen (tnf receptor superfamily member 5)</a>                                                      | CD40        | 6.15e-005      | 0.7 |
| 204581_at   | <a href="#">myelin associated glycoprotein</a>                                                                        | CD22        | 1e-007         | 0.4 |
| 202351_at   | <a href="#">integrin, alpha v (vitronectin receptor, alpha polypeptide, antigen cd51)</a>                             | ITGAV       | 0.0003276      | 1.3 |
| 212998_x_at | <a href="#">major histocompatibility complex, class ii, dq beta 1</a>                                                 | HLA-DQB1    | 0.0002754      | 0.8 |
| 226878_at   | <a href="#">major histocompatibility complex, class ii, do alpha</a>                                                  | HLA-DOA     | < 1E-07        | 0.6 |
| 205786_s_at | <a href="#">integrin, alpha m (complement component 3 receptor 3 subunit)</a>                                         | ITGAM       | 0.0003086      | 1.2 |
| 226482_s_at | <a href="#">f11 receptor</a>                                                                                          | hCG_20857   | 0.0001467      | 0.8 |

|              |                                                                                           |      |           |            |
|--------------|-------------------------------------------------------------------------------------------|------|-----------|------------|
| 231721_at    | <a href="#">junctional adhesion molecule 3</a>                                            | JAM3 | 0.0009173 | <b>0.7</b> |
| 225369_at    | <a href="#">huel (c4orf1)-interacting protein sialophorin (gpl115, leukosialin, cd43)</a> | ESAM | 1.2e-006  | <b>0.6</b> |
| 1568964_x_at |                                                                                           | SPN  | 3e-007    | <b>1.4</b> |

### Cytokine-cytokine receptor interaction (31 genes)

| Affy ID     | Gene Name                                                                                                   | Gene Symbol | t-test p-value | FC         |
|-------------|-------------------------------------------------------------------------------------------------------------|-------------|----------------|------------|
| 204773_at   | <a href="#">interleukin 11 receptor, alpha</a>                                                              | IL11RA      | 0.0003965      | <b>0.7</b> |
| 224027_at   | <a href="#">chemokine (c-c motif) ligand 28</a>                                                             | CCL28       | 0.0001176      | <b>0.7</b> |
| 206618_at   | <a href="#">interleukin 18 receptor 1</a>                                                                   | IL18R1      | 9.25e-005      | <b>1.8</b> |
| 241819_at   | <a href="#">tumor necrosis factor (ligand) superfamily, member 8</a>                                        | TNFSF8      | 4e-005         | <b>0.5</b> |
| 211355_x_at | <a href="#">leptin receptor</a>                                                                             | LEPR        | 0.0009263      | <b>0.7</b> |
| 211333_s_at | <a href="#">fas ligand (tnf superfamily, member 6)</a>                                                      | FASLG       | < 1E-07        | <b>4.2</b> |
| 206126_at   | <a href="#">burkitt lymphoma receptor 1, gtp binding protein (chemokine (c-x-c motif) receptor 5)</a>       | BLR1        | 0.0005654      | <b>0.6</b> |
| 215346_at   | <a href="#">cd40 antigen (tnf receptor superfamily member 5)</a>                                            | CD40        | 6.15e-005      | <b>0.7</b> |
| 206150_at   | <a href="#">tumor necrosis factor receptor superfamily, member 7</a>                                        | CD27        | 4.8e-006       | <b>0.7</b> |
| 219423_x_at | <a href="#">tumor necrosis factor receptor superfamily, member 25</a>                                       | TNFRSF25    | 0.0009294      | <b>0.7</b> |
| 206366_x_at | <a href="#">chemokine (c motif) ligand 2</a>                                                                | XCL2        | 4.8e-006       | <b>1.9</b> |
| 206390_x_at | <a href="#">platelet factor 4 (chemokine (c-x-c motif) ligand 4)</a>                                        | PF4         | 3.24e-005      | <b>0.8</b> |
| 218718_at   | <a href="#">spinal cord-derived growth factor; secretory growth factor-like protein fallotein</a>           | PDGFC       | 5.6e-006       | <b>0.7</b> |
| 207643_s_at | <a href="#">tumor necrosis factor receptor superfamily, member 1a</a>                                       | TNFRSF1A    | 3.24e-005      | <b>1.4</b> |
| 204103_at   | <a href="#">chemokine (c-c motif) ligand 4</a>                                                              | CCL4        | 2.6e-006       | <b>2.1</b> |
| 207815_at   | <a href="#">platelet factor 4 variant 1</a>                                                                 | PF4V1       | 5.28e-005      | <b>0.7</b> |
| 215101_s_at | <a href="#">chemokine (c-x-c motif) ligand 5</a>                                                            | CXCL5       | 1.98e-005      | <b>0.6</b> |
| 206999_at   | <a href="#">interleukin 12 receptor, beta 2</a>                                                             | IL12RB2     | 3.2e-006       | <b>2.0</b> |
| 206254_at   | <a href="#">epidermal growth factor (beta-urogastrone)</a>                                                  | EGF         | 0.0003425      | <b>0.8</b> |
| 207339_s_at | <a href="#">lymphotoxin beta (tnf superfamily, member 3)</a>                                                | LTB         | 6e-007         | <b>0.7</b> |
| 207008_at   | <a href="#">interleukin 8 receptor, beta</a>                                                                | IL8RB       | 8.68e-005      | <b>1.5</b> |
| 207072_at   | <a href="#">interleukin 18 receptor accessory protein</a>                                                   | IL18RAP     | 2.6e-006       | <b>1.9</b> |
| 206337_at   | <a href="#">chemokine (c-c motif) receptor 7</a>                                                            | CCR7        | 1.5e-006       | <b>0.7</b> |
| 205291_at   | <a href="#">interleukin 2 receptor, beta</a>                                                                | IL2RB       | 4e-007         | <b>1.8</b> |
| 203233_at   | <a href="#">interleukin 4 receptor</a>                                                                      | IL4R        | 2e-007         | <b>0.6</b> |
| 206693_at   | <a href="#">interleukin 7</a>                                                                               | IL7         | 0.0006767      | <b>0.7</b> |
| 214146_s_at | <a href="#">pro-platelet basic protein (chemokine (c-x-c motif) ligand 7)</a>                               | PPBP        | 0.0005641      | <b>0.8</b> |
| 210607_at   | <a href="#">fms-related tyrosine kinase 3 ligand</a>                                                        | FLT3LG      | 0.0000059      | <b>0.7</b> |
| 206943_at   | <a href="#">transforming growth factor, beta receptor i (activin a receptor type ii-like kinase, 53kda)</a> | TGFBR1      | 0.0000376      | <b>1.5</b> |

|           |                                                                        |           |           |            |
|-----------|------------------------------------------------------------------------|-----------|-----------|------------|
| 231775_at | <a href="#">tumor necrosis factor receptor superfamily, member 10a</a> | TNFRSF10A | 0.0005085 | <b>0.8</b> |
| 205898_at | <a href="#">chemokine (c-x3-c motif) receptor 1</a>                    | CX3CR1    | 0.0000034 | <b>1.8</b> |

### B cell receptor signaling pathway (12 genes)

| Affy ID     | Gene Name                                                                                           | Gene Symbol | t-test p-value | FC         |
|-------------|-----------------------------------------------------------------------------------------------------|-------------|----------------|------------|
| 226991_at   | <a href="#">nuclear factor of activated t-cells, cytoplasmic, calcineurin-dependent 2</a>           | NFATC2      | 0.0001061      | <b>1.4</b> |
| 207655_s_at | <a href="#">b-cell linker</a>                                                                       | BLNK        | 0.0000017      | <b>0.6</b> |
| 205049_s_at | <a href="#">cd79a antigen (immunoglobulin-associated alpha)</a>                                     | CD79A       | 0.0000001      | <b>0.5</b> |
| 215925_s_at | <a href="#">cd72 antigen</a>                                                                        | CD72        | 0.0000554      | <b>0.5</b> |
| 1562368_at  | <a href="#">caspase recruitment domain family, member 11</a>                                        | CARD11      | 0.000567       | <b>1.6</b> |
| 211105_s_at | <a href="#">nuclear factor of activated t-cells, cytoplasmic, calcineurin-dependent 1</a>           | NFATC1      | 0.0005048      | <b>0.8</b> |
| 204581_at   | <a href="#">cd22 antigen</a>                                                                        | CD22        | 0.0000001      | <b>0.4</b> |
| 206369_s_at | <a href="#">phosphoinositide-3-kinase, catalytic, gamma polypeptide</a>                             | PIK3CG      | 0.0005373      | <b>1.2</b> |
| 201502_s_at | <a href="#">nuclear factor of kappa light polypeptide gene enhancer in b-cells inhibitor, alpha</a> | NFKBIA      | 0.0000215      | <b>0.6</b> |
| 205544_s_at | <a href="#">complement component (3d/epstein barr virus) receptor 2</a>                             | CR2         | 0.0000082      | <b>0.6</b> |
| 205297_s_at | <a href="#">cd79b antigen (immunoglobulin-associated beta)</a>                                      | CD79B       | 0.0000014      | <b>0.6</b> |
| 206398_s_at | <a href="#">cd19 antigen</a>                                                                        | CD19        | 0.0000025      | <b>0.4</b> |

### Glycan structures - biosynthesis 1 (17 genes)

| Affy ID     | Gene Name                                                                                                      | Gene Symbol | t-test p-value | FC         |
|-------------|----------------------------------------------------------------------------------------------------------------|-------------|----------------|------------|
| 218918_at   | <a href="#">mannosidase, alpha, class 1c, member 1</a>                                                         | MAN1C1      | 0.0008033      | <b>0.8</b> |
| 208116_s_at | <a href="#">mannosidase, alpha, class 1a, member 1</a>                                                         | MAN1A1      | 0.0005561      | <b>1.4</b> |
| 221485_at   | <a href="#">udp-gal:betaglcnac beta 1,4-galactosyltransferase, polypeptide 5</a>                               | B4GALT5     | 0.0000221      | <b>1.4</b> |
| 210540_s_at | <a href="#">udp-gal:betaglcnac beta 1,4-galactosyltransferase, polypeptide 4</a>                               | B4GALT4     | 0.0000155      | <b>1.4</b> |
| 226372_at   | <a href="#">carbohydrate (chondroitin 4) sulfotransferase 11</a>                                               | CHST11      | 0.0000011      | <b>1.6</b> |
| 217788_s_at | <a href="#">udp-n-acetyl-alpha-d-galactosamine:polypeptide n-acetylgalactosaminyltransferase 2 (galnac-t2)</a> | GALNT2      | 0.0006708      | <b>1.2</b> |
| 200046_at   | <a href="#">defender against cell death 1</a>                                                                  | DAD1        | 0.0011852      | <b>0.9</b> |
| 1569136_at  | <a href="#">mannosyl (alpha-1,3)-glycoprotein beta-1,4-n-acetylglucosaminyltransferase, isozyme a</a>          | MGAT4A      | 0.0010144      | <b>0.7</b> |
| 219326_s_at | <a href="#">udp-glcnac:betagal beta-1,3-n-acetylglucosaminyltransferase 1</a>                                  | B3GNT2      | 0.0007756      | <b>1.3</b> |

|             |                                                                                                                  |           |           |     |
|-------------|------------------------------------------------------------------------------------------------------------------|-----------|-----------|-----|
| 225621_at   | <a href="#">asparagine-linked glycosylation 2 homolog (yeast, alpha-1,3-mannosyltransferase)</a>                 | ALG2      | 0.0000501 | 1.3 |
| 218885_s_at | <a href="#">udp-n-acetyl-alpha-d-galactosamine:polypeptide n-acetylgalactosaminyltransferase 12 (galnac-t12)</a> | GALNT12   | 0.0001627 | 0.8 |
| 203397_s_at | <a href="#">udp-n-acetyl-alpha-d-galactosamine:polypeptide n-acetylgalactosaminyltransferase 3 (galnac-t3)</a>   | GALNT3    | 0.000014  | 1.6 |
| 222235_s_at | <a href="#">chondroitin sulfate galnac-2 carbohydrate (n-acetylglucosamine-6-o) sulfotransferase 2</a>           | GALNACT-2 | 0.0000682 | 1.3 |
| 203921_at   | <a href="#">fucosyltransferase 11 (alpha (1,3) fucosyltransferase)</a>                                           | CHST2     | < 1E-07   | 1.9 |
| 238551_at   | <a href="#">carbohydrate (chondroitin 4) sulfotransferase 12</a>                                                 | FUT11     | 0.0000331 | 1.5 |
| 222786_at   | <a href="#">heparan sulfate 6-o-sulfotransferase 1</a>                                                           | CHST12    | 0.000001  | 1.7 |
| 225263_at   |                                                                                                                  | HS6ST1    | 0.0009186 | 1.2 |

### T cell receptor signaling pathway (14 genes)

| Affy ID     | Gene Name                                                                                           | Gene Symbol | t-test p-value | FC  |
|-------------|-----------------------------------------------------------------------------------------------------|-------------|----------------|-----|
| 211856_x_at | <a href="#">cd28 antigen (tp44)</a>                                                                 | CD28        | 0.0002584      | 0.7 |
| 215332_s_at | <a href="#">cd8 antigen, beta polypeptide 1 (p37)</a>                                               | CD8B        | 0.0001814      | 0.7 |
| 209682_at   | <a href="#">cas-br-m (murine) ecotropic retroviral transforming sequence b</a>                      | CBLB        | 0.0000653      | 1.3 |
| 226452_at   | <a href="#">pyruvate dehydrogenase kinase, isozyme 1</a>                                            | PDK1        | 0.0000275      | 0.7 |
| 213539_at   | <a href="#">cd3d antigen, delta polypeptide (tit3 complex)</a>                                      | CD3D        | 0.0009269      | 0.8 |
| 211105_s_at | <a href="#">nuclear factor of activated t-cells, cytoplasmic, calcineurin-dependent 1</a>           | NFATC1      | 0.0005048      | 0.8 |
| 206369_s_at | <a href="#">phosphoinositide-3-kinase, catalytic, gamma polypeptide</a>                             | PIK3CG      | 0.0005373      | 1.2 |
| 201502_s_at | <a href="#">nuclear factor of kappa light polypeptide gene enhancer in b-cells inhibitor, alpha</a> | NFKBIA      | 0.0000215      | 0.6 |
| 226991_at   | <a href="#">nuclear factor of activated t-cells, cytoplasmic, calcineurin-dependent 2</a>           | NFATC2      | 0.0001061      | 1.4 |
| 208406_s_at | <a href="#">grb2-related adaptor protein 2</a>                                                      | GRAP2       | 0.0000545      | 0.8 |
| 210031_at   | <a href="#">cd3z antigen, zeta polypeptide (tit3 complex)</a>                                       | CD247       | 0.0000003      | 1.5 |
| 202789_at   | <a href="#">phospholipase c, gamma 1</a>                                                            | PLCG1       | 0.0000568      | 0.8 |
| 1559101_at  | <a href="#">fyn oncogene related to src, fgr, yes</a>                                               | FYN         | 0.0000472      | 1.5 |
| 1562368_at  | <a href="#">caspase recruitment domain family, member 11</a>                                        | CARD11      | 0.000567       | 1.6 |

### Apoptosis (13 genes)

| Affy ID | Gene Name | Gene Symbol | t-test p-value | FC |
|---------|-----------|-------------|----------------|----|
|---------|-----------|-------------|----------------|----|

|             |                                                                                                                |           |           |            |
|-------------|----------------------------------------------------------------------------------------------------------------|-----------|-----------|------------|
| 210538_s_at | <a href="#">baculoviral iap repeat-containing 3</a>                                                            | BIRC3     | 0.0001183 | <b>0.7</b> |
| 203685_at   | <a href="#">b-cell cll/lymphoma 2</a>                                                                          | BCL2      | 0.0006331 | <b>0.8</b> |
| 206369_s_at | <a href="#">phosphoinositide-3-kinase, catalytic, gamma polypeptide</a>                                        | PIK3CG    | 0.0005373 | <b>1.2</b> |
| 201502_s_at | <a href="#">nuclear factor of kappa light polypeptide gene enhancer in b-cells inhibitor, alpha</a>            | NFKBIA    | 0.0000215 | <b>0.6</b> |
| 211333_s_at | <a href="#">fas ligand (tnf superfamily, member 6)</a>                                                         | FASLG     | < 1E-07   | <b>4.2</b> |
| 209790_s_at | <a href="#">caspase 6, apoptosis-related cysteine peptidase</a>                                                | CASP6     | 0.0000128 | <b>0.7</b> |
| 205641_s_at | <a href="#">tnfrsf1a-associated via death domain protein kinase, camp-dependent, regulatory, type ii, beta</a> | TRADD     | 0.0001908 | <b>0.8</b> |
| 203680_at   | <a href="#">tumor necrosis factor receptor superfamily, member 1a</a>                                          | PRKAR2B   | 0.0006462 | <b>0.8</b> |
| 207643_s_at | <a href="#">caspase 10, apoptosis-related cysteine peptidase</a>                                               | TNFRSF1A  | 0.0000324 | <b>1.4</b> |
| 205467_at   | <a href="#">tumor necrosis factor receptor superfamily, member 10a</a>                                         | CASP10    | 0.0000213 | <b>1.4</b> |
| 231775_at   | <a href="#">protein kinase, camp-dependent, catalytic, beta</a>                                                | TNFRSF10A | 0.0005085 | <b>0.8</b> |
| 235780_at   | <a href="#">casp8 and fadd-like apoptosis regulator</a>                                                        | PRKACB    | 0.0001284 | <b>0.8</b> |
| 239629_at   |                                                                                                                | CFLAR     | 0.0001626 | <b>1.4</b> |

### Type I diabetes mellitus (8 genes)

| Affy ID      | Gene Name                                                                                    | Gene Symbol | t-test p-value | FC         |
|--------------|----------------------------------------------------------------------------------------------|-------------|----------------|------------|
| 211856_x_at  | <a href="#">cd28 antigen (tp44)</a>                                                          | CD28        | 0.0002584      | <b>0.7</b> |
| 1553681_a_at | <a href="#">perforin 1 (pore forming protein)</a>                                            | PRF1        | 0.0000003      | <b>2.1</b> |
| 205671_s_at  | <a href="#">major histocompatibility complex, class ii, do beta</a>                          | HLA-DOB     | < 1E-07        | <b>0.4</b> |
| 210164_at    | <a href="#">granzyme b (granzyme 2, cytotoxic t-lymphocyte-associated serine esterase 1)</a> | GZMB        | < 1E-07        | <b>2.3</b> |
| 221978_at    | <a href="#">major histocompatibility complex, class i, f</a>                                 | HLA-F       | 0.0001198      | <b>1.4</b> |
| 212998_x_at  | <a href="#">major histocompatibility complex, class ii, dq beta 1</a>                        | HLA-DQB1    | 0.0002754      | <b>0.8</b> |
| 226878_at    | <a href="#">major histocompatibility complex, class ii, do alpha</a>                         | HLA-DOA     | < 1E-07        | <b>0.6</b> |
| 211333_s_at  | <a href="#">fas ligand (tnf superfamily, member 6)</a>                                       | FASLG       | < 1E-07        | <b>4.2</b> |

### Prostate cancer (13 genes)

| Affy ID     | Gene Name                                                                               | Gene Symbol | t-test p-value | FC         |
|-------------|-----------------------------------------------------------------------------------------|-------------|----------------|------------|
| 210948_s_at | <a href="#">lymphoid enhancer-binding factor 1</a>                                      | LEF1        | 0.0000079      | <b>0.6</b> |
| 1552263_at  | <a href="#">mitogen-activated protein kinase 1</a>                                      | MAPK1       | 0.0000039      | <b>1.5</b> |
| 203685_at   | <a href="#">b-cell cll/lymphoma 2</a>                                                   | BCL2        | 0.0006331      | <b>0.8</b> |
| 205016_at   | <a href="#">transforming growth factor, alpha</a>                                       | TGFA        | 0.0000996      | <b>1.4</b> |
| 200779_at   | <a href="#">activating transcription factor 4 (tax-responsive enhancer element b67)</a> | ATF4        | 0.0008771      | <b>0.8</b> |
| 206369_s_at | <a href="#">phosphoinositide-3-kinase, catalytic, gamma polypeptide</a>                 | PIK3CG      | 0.0005373      | <b>1.2</b> |

|             |                                                                                                                                        |        |           |            |
|-------------|----------------------------------------------------------------------------------------------------------------------------------------|--------|-----------|------------|
| 201502_s_at | <a href="#">nuclear factor of kappa light polypeptide gene enhancer in b-cells inhibitor, alpha</a>                                    | NFKBIA | 0.0000215 | <b>0.6</b> |
| 206254_at   | <a href="#">epidermal growth factor (beta-urogastrone)</a>                                                                             | EGF    | 0.0003425 | <b>0.8</b> |
| 202723_s_at | <a href="#">forkhead box o1a (rhabdomyosarcoma)</a>                                                                                    | FOXO1  | 0.0000456 | <b>0.6</b> |
| 219304_s_at | <a href="#">platelet derived growth factor d v-erb-b2 erythroblastic leukemia viral oncogene homolog 2, neuro/glioblastoma derived</a> | PDGFD  | 0.0000025 | <b>2.8</b> |
| 216836_s_at | <a href="#">oncogene homolog (avian) spinal cord-derived growth factor; secretory growth factor-like protein</a>                       | ERBB2  | 0.000007  | <b>1.9</b> |
| 218718_at   | <a href="#">fallotein</a>                                                                                                              | PDGFC  | 0.0000056 | <b>0.7</b> |
| 205254_x_at | <a href="#">transcription factor 7 (t-cell specific, hmg-box)</a>                                                                      | TCF7   | 0.0000088 | <b>0.6</b> |

### Calcium signaling pathway (21 genes)

| Affy ID     | Gene Name                                                                                             | Gene Symbol | t-test p-value | FC         |
|-------------|-------------------------------------------------------------------------------------------------------|-------------|----------------|------------|
| 205692_s_at | <a href="#">cd38 antigen (p45)</a>                                                                    | CD38        | 0.000027       | <b>1.8</b> |
| 1554306_at  | <a href="#">inositol 1,4,5-trisphosphate 3-kinase b</a>                                               | ITPKB       | 0.0000826      | <b>0.7</b> |
| 209321_s_at | <a href="#">adenylate cyclase 3 coagulation factor ii (thrombin) receptor</a>                         | ADCY3       | 0.0001676      | <b>0.7</b> |
| 203989_x_at | <a href="#">protein kinase c, alpha</a>                                                               | F2R         | 0.0000559      | <b>1.4</b> |
| 213093_at   | <a href="#">adenylate cyclase 9</a>                                                                   | PRKCA       | 0.0000714      | <b>0.7</b> |
| 204497_at   | <a href="#">inositol 1,4,5-triphosphate receptor, type 1</a>                                          | ADCY9       | 0.0006261      | <b>1.4</b> |
| 240052_at   | <a href="#">thromboxane a2 receptor</a>                                                               | ITPR1       | 0.0003139      | <b>0.7</b> |
| 336_at      | <a href="#">purinergic receptor p2x, ligand-gated ion channel, 5</a>                                  | TBXA2R      | 0.0002172      | <b>0.7</b> |
| 210448_s_at | <a href="#">v-erb-b2 erythroblastic leukemia viral oncogene homolog 2, neuro/glioblastoma derived</a> | P2RX5       | 0.0000001      | <b>0.5</b> |
| 216836_s_at | <a href="#">oncogene homolog (avian)</a>                                                              | ERBB2       | 0.000007       | <b>1.9</b> |
| 202789_at   | <a href="#">phospholipase c, gamma 1</a>                                                              | PLCG1       | 0.0000568      | <b>0.8</b> |
| 214157_at   | <a href="#">gnas complex locus</a>                                                                    | GNAS        | 0.0005578      | <b>0.8</b> |
| 205410_s_at | <a href="#">atpase, ca++ transporting, plasma membrane 4</a>                                          | ATP2B4      | 0.0001709      | <b>1.5</b> |
| 228555_at   | <a href="#">calcium/calmodulin-dependent protein kinase (cam kinase) ii delta</a>                     | CAMK2D      | 0.0000957      | <b>0.8</b> |
| 214933_at   | <a href="#">calcium channel, voltage-dependent, p/q type, alpha 1a subunit</a>                        | CACNA1A     | 0.0003901      | <b>0.7</b> |
| 241871_at   | <a href="#">calcium/calmodulin-dependent protein kinase iv</a>                                        | CAMK4       | 0.0003302      | <b>0.7</b> |
| 235780_at   | <a href="#">protein kinase, camp-dependent, catalytic, beta</a>                                       | PRKACB      | 0.0001284      | <b>0.8</b> |
| 200622_x_at | <a href="#">calmodulin 1 (phosphorylase kinase, delta)</a>                                            | CALM3       | 0.000726       | <b>0.8</b> |
| 207522_s_at | <a href="#">atpase, ca++ transporting, ubiquitous</a>                                                 | ATP2A3      | 0.0008972      | <b>0.8</b> |
| 202555_s_at | <a href="#">myosin, light polypeptide kinase</a>                                                      | MYLK        | 0.0000035      | <b>0.7</b> |

|           |                                                        |       |           |     |
|-----------|--------------------------------------------------------|-------|-----------|-----|
| 206170_at | <a href="#">adrenergic, beta-2-, receptor, surface</a> | ADRB2 | 0.0000005 | 2.4 |
|-----------|--------------------------------------------------------|-------|-----------|-----|

**Adherens junction (11 genes)**

| Affy ID     | Gene Name                                                                                                                                                                   | Gene Symbol | t-test p-value | FC  |
|-------------|-----------------------------------------------------------------------------------------------------------------------------------------------------------------------------|-------------|----------------|-----|
| 200601_at   | <a href="#">actinin, alpha 4</a>                                                                                                                                            | ACTN4       | 0.0005128      | 1.2 |
| 202933_s_at | <a href="#">v-yes-1 yamaguchi sarcoma viral oncogene homolog 1</a><br><a href="#">v-erb-b2 erythroblastic leukemia viral oncogene homolog 2, neuro/glioblastoma derived</a> | YES1        | 0.0000023      | 2.2 |
| 216836_s_at | <a href="#">oncogene homolog (avian)</a>                                                                                                                                    | ERBB2       | 0.000007       | 1.9 |
| 210948_s_at | <a href="#">lymphoid enhancer-binding factor 1</a>                                                                                                                          | LEF1        | 0.0000079      | 0.6 |
| 1552263_at  | <a href="#">mitogen-activated protein kinase 1</a>                                                                                                                          | MAPK1       | 0.0000039      | 1.5 |
| 1559101_at  | <a href="#">fyn oncogene related to src, fgr, yes</a>                                                                                                                       | FYN         | 0.0000472      | 1.5 |
| 208637_x_at | <a href="#">actinin, alpha 1</a>                                                                                                                                            | ACTN1       | 0.0000802      | 0.8 |
| 224813_at   | <a href="#">wiskott-aldrich syndrome-like transforming growth factor, beta receptor i (activin a receptor type ii-like kinase, 53kda)</a>                                   | WASL        | 0.0002249      | 1.2 |
| 206943_at   | <a href="#">transcription factor 7 (t-cell specific, hmg-box)</a>                                                                                                           | TGFBR1      | 0.0000376      | 1.5 |
| 205254_x_at | <a href="#">iq motif containing gtpase activating protein 1</a>                                                                                                             | TCF7        | 0.0000088      | 0.6 |
| 213446_s_at | <a href="#">iq motif containing gtpase activating protein 1</a>                                                                                                             | IQGAP1      | 0.0001124      | 1.2 |
